# Supplementary material for: Bulk tissue cell type deconvolution with multi-subject single-cell expression reference
Source: PubMed Central journal article supplement (PMC6342984; doi:10.1038/s41467-018-08023-x), 2019-01-22
Supplement: 41467_2018_8023_MOESM1_ESM.pdf [file 41467_2018_8023_MOESM1_ESM.pdf]

# Bulk Tissue Cell Type Deconvolution with Multi-Subject Single-Cell Expression Reference

Wang et al.

# Supplementary Information

## Supplementary Notes

### Supplementary Note 1: Construction of artificial bulk tissue RNA-seq data

We construct artificial bulk tissue RNA-seq data by summing up read counts across all cells from the same subject in the single-cell RNA-seq data. By way of construction, the cell type proportions of the artificial bulk data are equal to the observed cell type proportions in the single-cell data, and this allows us to compare estimated cell type proportions from various methods with the true proportions. **Supplementary Figure 1b** shows that the artificial bulk tissue RNA-seq data have similar gene expression as the real bulk RNA-seq data generated from the same subjects.

### Supplementary Note 2: Impact of varying cell type proportions of artificial bulk data in deconvolution

**Figure 2b** in the main text shows the deconvolution results from MuSiC, NNLS, BSEQ-sc and CIBERSORT, and these results indicate that the alpha cell proportion is over-estimated by all methods except for MuSiC. To evaluate the impact of different cell type proportions in the bulk data on deconvolution estimates, we generated additional artificial bulk data to show that MuSiC can still reliably estimate cell type proportions even when the true cell type proportions in the bulk data are very different from the cell type proportions in the single-cell reference. In this newly constructed benchmark data, the single-cell reference stays the same while we construct the artificial bulk data from Xin et al.<sup>1</sup> by combining cells from 2 subjects with 75% alpha cells dropped. In this way, beta cells become the dominant cell type in the artificial bulk data, as expected for real bulk tissue. **Supplementary Figure 2c** shows that only MuSiC recovers the true cell type composition, revealing that beta cells are the major cell type in the artificial bulk data, whereas the other methods overestimate the alpha cell proportion, indicating that these methods are more likely to be influenced by the cell type proportions in the single-cell reference. This analysis also gives the likely explanation for why, in the Fadista et al.<sup>2</sup> data, all methods that rely on CIBERSORT marker genes grossly overestimate alpha cell proportion.

### Supplementary Note 3: Impact of missing cell types in single-cell reference on deconvolution

One of the limitations of single-cell RNA-seq is cell loss during cell dissociation. This not only biases cell type proportions, but also leads to failure of detecting certain cell types, especially those rare cell types. In practice, the single-cell reference dataset might be incomplete, and not every cell type present in the bulk data is included in the single-cell reference. Since the deconvolution methods rely on observed cell types in the single-cell reference, it is important to evaluate whether cell type proportions can be reliably estimated when some cell types are missing in the single-cell reference.

We evaluate MuSiC, NNLS, BSEQ-sc and CIBERSORT with missing cell types (**Supplementary Figure 3, Supplementary Table 3**). The artificial bulk data consist of 6 cell types while the single-cell reference only consists of 5 cell types. The evaluation shows that when major cell types are missed, none of the methods can give accurate estimates. However,

the cell type proportions are estimated accurately by MuSiC when the missing cell type is not the dominant cell type in the bulk tissue.

#### Supplementary Note 4: Tolerance of bias in single-cell relative abundance on deconvolution

The protocol discrepancies between bulk and single-cell datasets may lead to estimation bias. To evaluate the degree of bias tolerance relative to the biological signal, we manually introduce noise to cross-subject average of the single-cell obtained relative abundance  $\theta_g^k$ . Because of the constraint that  $\sum_{g=1}^G \theta_g^k = 1$ , we generate biased relative abundance by Dirichlet distribution, denoted by  $\theta_g^{k'}$ . Consider one cell type only. For simplicity, we drop the superscript  $k$  for cell type. We assume the relative abundances of  $G$  genes follow a Dirichlet distribution,

$$\left(\theta_1', \dots, \theta_G'\right) \sim \text{Dirichlet}(t \times (\theta_1, \dots, \theta_G)), \quad (1)$$

where  $t$  is a scaling factor. The mean and variance of  $\theta_g'$  are  $\theta_g$  and  $\frac{\theta_g(1-\theta_g)}{t+1}$ , respectively. By setting  $t = 999, 1332, 1999$  and  $3999$ , corresponding to  $\frac{\text{var}[\theta_g']}{E^2[\theta_g']} \approx (\theta_g(1+t))^{-1} \geq 2, 1.5, 1$  and  $0.5$ , we simulated 100 times the cross-subject average of relative abundance of 6 major cell types from Segerstolpe et al.<sup>3</sup> We deconvolved the artificial bulk data constructed by Xin et al.<sup>1</sup> (**Supplementary Figure 8c**) and MuSiC provides accurate cell type proportions even with biased relative abundance as input.

#### Supplementary Note 5: Robustness to single-cell dropout noise on deconvolution

Single-cell RNA-seq data are prone to gene dropout and the dropout rates can differ across datasets. To evaluate the robustness of MuSiC, NNLS, BSEQ-sc and CIBERSORT to dropout in single-cell data, we constructed artificial bulk data from the original scRNA-seq data and deconvolve it by single-cell data with additional dropout noise. Following Jia et al.<sup>4</sup>, the dropout rate  $\pi_{jgc}$  is generated by

$$\pi_{jgc} = \frac{1}{1 + k \exp(k \ln X_{jgc})}, \quad (2)$$

where  $X_{jgc}$  is the observed read counts,  $k$  is the dropout rate parameters. The simulated read count  $X_{jgc}'$  follows distribution such that

$$P\left(X_{jgc}' = X_{jgc}\right) = \pi_{jgc}, \quad P\left(X_{jgc}' = 0\right) = 1 - \pi_{jgc}. \quad (3)$$

We evaluated four different dropout rates with  $k = 1, 0.5, 0.2$  and  $0.1$  (**Supplementary Figure 8a-b**). In general, adding more dropout noise leads to lower MuSiC estimation accuracy. Compared with other methods, MuSiC consistently performs better in the presence of dropout noise.

#### Supplementary Note 6: Convergence of MuSiC with different starting points

MuSiC estimates cell type proportions by weighted non-negative least square (W-NNLS), which might be sensitive to the choice of starting values. To examine the convergence property of

MuSiC, we re-analyzed the data in **Figure 2b** to show convergence with different starting points. The artificial bulk data is constructed by Xin et al.<sup>1</sup> while the single-cell reference consists of 6 healthy subjects from Segerstolpe et al.<sup>3</sup> The cell type proportions of four cell types: alpha, beta, delta and gamma are estimated using MuSiC with different starting points are shown in **Supplementary Table 8**. W-NNLS converges to the same value regardless of the starting points (**Supplementary Figure 9**).

### Supplementary Note 7: Complex models

More complex error models, such as the gamma may give better fit to data, but could be computationally more challenging to fit. Here our empirical results show that the Gaussian model already gives accurate estimates.

## Supplementary Tables

**Supplementary Table 1: Linear regression to examine the relationship between estimated cell type proportions (Segerstolpe et al.<sup>3</sup> as reference) and HbA1c levels. The fitted linear model is estimated cell type proportion ~ HbA1c + Age + BMI + Gender. Significant results (p value < 0.05) are highlighted.**

| Cell type     |             | MuSiC    |           |          | BSEQ-sc  |           |          |
|---------------|-------------|----------|-----------|----------|----------|-----------|----------|
|               |             | Estimate | Std.Error | P value  | Estimate | Std.Error | P value  |
| <b>alpha</b>  | (Intercept) | 0.380382 | 0.207754  | 0.07125  | 1.351464 | 0.240052  | 3.26E-07 |
|               | HbA1c       | -0.00203 | 0.027737  | 0.941834 | -0.07377 | 0.032049  | 0.024249 |
|               | Age         | -0.00097 | 0.001935  | 0.617836 | 0.002753 | 0.002236  | 0.222198 |
|               | BMI         | -0.00167 | 0.007945  | 0.834127 | -0.01711 | 0.00918   | 0.066449 |
|               | Gender      | 0.033135 | 0.042881  | 0.442221 | -0.00638 | 0.049548  | 0.897869 |
| <b>beta</b>   | (Intercept) | 0.877022 | 0.190276  | 1.71E-05 | 0.065847 | 0.046433  | 0.16047  |
|               | HbA1c       | -0.0614  | 0.025403  | 0.01819  | -0.00295 | 0.006199  | 0.635957 |
|               | Age         | 0.002639 | 0.001772  | 0.140873 | 0.000576 | 0.000433  | 0.187339 |
|               | BMI         | -0.01362 | 0.007276  | 0.065293 | -0.00162 | 0.001776  | 0.365258 |
|               | Gender      | -0.07987 | 0.039274  | 0.04566  | -0.00541 | 0.009584  | 0.574159 |
| <b>gamma</b>  | (Intercept) | 0.008556 | 0.010504  | 0.417988 | 0.102201 | 0.024366  | 7.69E-05 |
|               | HbA1c       | 0.001047 | 0.001402  | 0.457785 | -0.00278 | 0.003253  | 0.396334 |
|               | Age         | 9.21E-05 | 9.78E-05  | 0.349431 | -0.00013 | 0.000227  | 0.570225 |
|               | BMI         | -0.00057 | 0.000402  | 0.160731 | -0.00207 | 0.000932  | 0.029738 |
|               | Gender      | -0.00165 | 0.002168  | 0.450416 | -0.00092 | 0.005029  | 0.855252 |
| <b>delta</b>  | (Intercept) | 0.057678 | 0.010592  | 6.81E-07 | 0.015539 | 0.018715  | 0.409122 |
|               | HbA1c       | -0.00106 | 0.001414  | 0.455427 | 0.002017 | 0.002499  | 0.422131 |
|               | Age         | -0.00016 | 9.87E-05  | 0.12039  | 9.99E-05 | 0.000174  | 0.568316 |
|               | BMI         | -0.0011  | 0.000405  | 0.008142 | -0.00103 | 0.000716  | 0.154263 |
|               | Gender      | 0.000424 | 0.002186  | 0.846817 | -0.00254 | 0.003863  | 0.512616 |
| <b>acinar</b> | (Intercept) | -0.10619 | 0.131102  | 0.420638 | -0.14553 | 0.052092  | 0.006672 |
|               | HbA1c       | 0.034967 | 0.017503  | 0.049519 | 0.019075 | 0.006955  | 0.007684 |
|               | Age         | -0.00247 | 0.001221  | 0.046841 | 0.00066  | 0.000485  | 0.178153 |
|               | BMI         | 0.00662  | 0.005013  | 0.190883 | 0.002008 | 0.001992  | 0.316847 |
|               | Gender      | 0.05332  | 0.02706   | 0.052632 | -0.02338 | 0.010752  | 0.032985 |

|               |             |          |          |          |          |          |          |
|---------------|-------------|----------|----------|----------|----------|----------|----------|
| <b>ductal</b> | (Intercept) | -0.21745 | 0.141008 | 0.127428 | -0.38952 | 0.232841 | 0.098686 |
|               | HbA1c       | 0.028474 | 0.018826 | 0.134781 | 0.058397 | 0.031086 | 0.064353 |
|               | Age         | 0.000863 | 0.001313 | 0.513005 | -0.00396 | 0.002169 | 0.072066 |
|               | BMI         | 0.010341 | 0.005392 | 0.059097 | 0.019814 | 0.008904 | 0.029191 |
|               | Gender      | -0.00536 | 0.029105 | 0.854406 | 0.038631 | 0.048059 | 0.424144 |

**Supplementary Table 2: Linear regression to examine the relationship between estimated cell type proportions (Baron et al.<sup>5</sup> as reference) and HbA1c levels. The fitted linear model is estimated cell type proportion ~ HbA1c + Age + BMI + Gender. Significant results (p value < 0.05) are highlighted.**

| Cell type     |             | MuSiC     |           |          | BSEQ-sc   |           |          |
|---------------|-------------|-----------|-----------|----------|-----------|-----------|----------|
|               |             | Estimate  | Std.Error | P value  | Estimate  | Std.Error | P value  |
| <b>alpha</b>  | (Intercept) | 1.000504  | 0.275906  | 0.000533 | 1.220529  | 0.187349  | 8.56E-09 |
|               | HbA1c       | -0.0259   | 0.036835  | 0.48424  | -0.06398  | 0.025012  | 0.012632 |
|               | Age         | 0.000234  | 0.00257   | 0.927855 | 0.001921  | 0.001745  | 0.274661 |
|               | BMI         | -0.01137  | 0.010551  | 0.28475  | -0.00681  | 0.007164  | 0.345275 |
|               | Gender      | 0.038364  | 0.056948  | 0.502676 | -0.02104  | 0.038669  | 0.588048 |
| <b>beta</b>   | (Intercept) | 0.315176  | 0.09427   | 0.001316 | 0.011001  | 0.016796  | 0.51455  |
|               | HbA1c       | -0.02843  | 0.012586  | 0.026936 | -3.70E-05 | 0.002242  | 0.986889 |
|               | Age         | -0.00081  | 0.000878  | 0.361952 | 0.000142  | 0.000156  | 0.366396 |
|               | BMI         | -0.00158  | 0.003605  | 0.661813 | -0.00044  | 0.000642  | 0.498345 |
|               | Gender      | -0.00927  | 0.019458  | 0.635249 | -0.00079  | 0.003467  | 0.819685 |
| <b>gamma</b>  | (Intercept) | -0.0172   | 0.055935  | 0.759333 | 0.040372  | 0.011566  | 0.000827 |
|               | HbA1c       | 0.001227  | 0.007468  | 0.869925 | 7.31E-05  | 0.001544  | 0.962362 |
|               | Age         | 0.00085   | 0.000521  | 0.107295 | -8.47E-05 | 0.000108  | 0.434521 |
|               | BMI         | -0.00042  | 0.002139  | 0.843112 | -0.0011   | 0.000442  | 0.015394 |
|               | Gender      | -0.00998  | 0.011545  | 0.390355 | -0.00048  | 0.002387  | 0.842519 |
| <b>delta</b>  | (Intercept) | 0.043785  | 0.009622  | 2.12E-05 | 0.012347  | 0.016882  | 0.466922 |
|               | HbA1c       | -0.00121  | 0.001285  | 0.349663 | 0.002763  | 0.002254  | 0.224153 |
|               | Age         | -8.79E-05 | 8.96E-05  | 0.330262 | 5.00E-05  | 0.000157  | 0.751577 |
|               | BMI         | -0.00093  | 0.000368  | 0.013618 | -0.00101  | 0.000646  | 0.1226   |
|               | Gender      | -0.00063  | 0.001986  | 0.753674 | -0.00098  | 0.003484  | 0.780352 |
| <b>acinar</b> | (Intercept) | 0.002232  | 0.042169  | 0.957925 | -0.23299  | 0.083467  | 0.006714 |
|               | HbA1c       | 0.013032  | 0.00563   | 0.023475 | 0.034902  | 0.011143  | 0.00251  |
|               | Age         | -0.00062  | 0.000393  | 0.119068 | -0.00015  | 0.000777  | 0.848086 |
|               | BMI         | -0.0008   | 0.001613  | 0.621478 | 0.006564  | 0.003192  | 0.043362 |
|               | Gender      | 0.013342  | 0.008704  | 0.129687 | -0.01866  | 0.017228  | 0.282488 |
| <b>ductal</b> | (Intercept) | -0.3445   | 0.218745  | 0.119669 | -0.05126  | 0.14      | 0.715354 |
|               | HbA1c       | 0.041276  | 0.029204  | 0.161852 | 0.026281  | 0.018691  | 0.164004 |
|               | Age         | 0.00043   | 0.002038  | 0.833485 | -0.00188  | 0.001304  | 0.153951 |
|               | BMI         | 0.015109  | 0.008365  | 0.075051 | 0.002786  | 0.005354  | 0.604398 |
|               | Gender      | -0.03183  | 0.04515   | 0.483036 | 0.04194   | 0.028896  | 0.151016 |

**Supplementary Table 3: Evaluation of deconvolution methods when there are missing cell types in the single-cell reference. The missing cell type is shown in bold and the proportions in the bulk tissue data are shown in parentheses.**

|                       |      |      |      |                       |       |       |      |
|-----------------------|------|------|------|-----------------------|-------|-------|------|
| <b>alpha</b> (0.447)  | RMSD | mAD  | R    | <b>beta</b> (0.137)   | RMSD  | mAD   | R    |
| MuSiC                 | 0.13 | 0.09 | 0.72 | MuSiC                 | 0.04  | 0.03  | 0.98 |
| NNLS                  | 0.27 | 0.18 | 0.42 | NNLS                  | 0.12  | 0.08  | 0.86 |
| BSEQ-sc               | 0.17 | 0.12 | 0.58 | BSEQ-sc               | 0.12  | 0.08  | 0.87 |
| CIBERSORT             | 0.12 | 0.09 | 0.77 | CIBERSORT             | 0.09  | 0.06  | 0.91 |
| <b>delta</b> (0.092)  | RMSD | mAD  | R    | <b>gamma</b> (0.062)  | RMSD  | mAD   | R    |
| MuSiC                 | 0.04 | 0.03 | 0.98 | MuSiC                 | 0.05  | 0.038 | 0.97 |
| NNLS                  | 0.12 | 0.08 | 0.82 | NNLS                  | 0.12  | 0.081 | 0.84 |
| BSEQ-sc               | 0.12 | 0.08 | 0.85 | BSEQ-sc               | 0.12  | 0.083 | 0.86 |
| CIBERSORT             | 0.10 | 0.07 | 0.90 | CIBERSORT             | 0.10  | 0.070 | 0.90 |
| <b>acinar</b> (0.084) | RMSD | mAD  | R    | <b>ductal</b> (0.177) | RMSD  | mAD   | R    |
| MuSiC                 | 0.05 | 0.04 | 0.97 | MuSiC                 | 0.050 | 0.037 | 0.97 |
| NNLS                  | 0.11 | 0.07 | 0.85 | NNLS                  | 0.067 | 0.046 | 0.96 |
| BSEQ-sc               | 0.14 | 0.10 | 0.79 | BSEQ-sc               | 0.084 | 0.064 | 0.93 |
| CIBERSORT             | 0.07 | 0.05 | 0.93 | CIBERSORT             | 0.076 | 0.058 | 0.94 |

**Supplementary Table 4: Summary of cell types of Park et al.<sup>6</sup> single-cell dataset. Park et al. sequenced 57,979 cells from healthy mouse kidneys and identified 16 cell types. As suggested in Park et al., we limited our consideration to the 13 confidently characterized cell types and eliminated CD-Trans and 2 novel cell types in our deconvolution analyses.**

| Cell Type                         | Abbr.    | # Cell | % Cell | Cell Type           | Abbr.   | # Cell | % Cell |
|-----------------------------------|----------|--------|--------|---------------------|---------|--------|--------|
| Endothelial                       | Endo     | 1,001  | 2.29   | Fibroblast          | Fib     | 549    | 1.26   |
| Podocyte                          | Podo     | 78     | 0.18   | Macrophage          | Macro   | 228    | 0.52   |
| Proximal tubule                   | PT       | 26,482 | 60.54  | Neutrophil          | Neutro  | 74     | 0.17   |
| Loop of Henle                     | LOH      | 1,581  | 3.61   | B lymphocyte        | B lymph | 235    | 0.54   |
| Distal convoluted tubule          | DCT      | 8,544  | 19.53  | T lymphocyte        | T lymph | 1,308  | 2.99   |
| Collecting duct principal cell    | CD-PC    | 870    | 1.99   | Natural killer cell | NK      | 313    | 0.72   |
| Collecting duct intercalated cell | CD-IC    | 1729   | 3.95   | Novel cell type 1   | Novel 1 | 601    | 1.37   |
| Collecting duct transitional cell | CD-Trans | 110    | 0.25   | Novel cell type 2   | Novel 2 | 42     | 0.10   |

**Supplementary Table 5: List of top 100 high weighted genes from the pancreatic islet analysis.**

| Rank | Segerstolpe | Xin      | GSE50244 | Rank | Segerstolpe | Xin      | GSE50244  |
|------|-------------|----------|----------|------|-------------|----------|-----------|
| 1    | GCG         | GCG      | MALAT1   | 51   | ITM2B       | EIF4A2   | RPS3A     |
| 2    | TTR         | MALAT1   | EEF1A1   | 52   | ENPP2       | CTSD     | RPL9      |
| 3    | MALAT1      | INS      | TTR      | 53   | ATP1A1      | RBP4     | SOD2      |
| 4    | SERPINA1    | TTR      | FTH1     | 54   | ANXA4       | HNRNPH1  | EIF4B     |
| 5    | SPP1        | FTL      | GCG      | 55   | HNRNPH1     | BSG      | HSPA8     |
| 6    | B2M         | PPP1CB   | CPE      | 56   | ALDOB       | EEF2     | PKM       |
| 7    | FTH1        | PCSK1N   | GNAS     | 57   | CD164       | RPS3     | SCG2      |
| 8    | CHGA        | CHGB     | RPL4     | 58   | HLA-A       | PDK4     | RPS24     |
| 9    | PIGR        | PSAP     | APP      | 59   | RIN2        | SSR1     | CD74      |
| 10   | IAPP        | CHGA     | CTSD     | 60   | ASAH1       | SCD      | SQSTM1    |
| 11   | SST         | EGR1     | HSP90AA1 | 61   | TMSB10      | DNAJC3   | TMBIM6    |
| 12   | FTL         | SRSF6    | RPLP0    | 62   | BSG         | SAR1A    | TXNRD1    |
| 13   | CALM2       | FTH1     | RPL7A    | 63   | CLDN4       | GPX4     | LCN2      |
| 14   | CHGB        | HSP90AB1 | HSP90AB1 | 64   | TMEM59      | PLD3     | RPL14     |
| 15   | SERPINA3    | SPINT2   | HSP90B1  | 65   | PPY         | ATP6AP1  | PDIA3     |
| 16   | ACTG1       | MAP1B    | UBC      | 66   | C10orf10    | ANP32E   | HDLBP     |
| 17   | SCG5        | RIN2     | CANX     | 67   | HSPA8       | TBL1XR1  | HNRNPK    |
| 18   | ALDH1A1     | GNAS     | PAM      | 68   | REG1B       | GNB2L1   | SCARB2    |
| 19   | TM4SF4      | SCG5     | RPS6     | 69   | P4HB        | SLC22A17 | RPL13A    |
| 20   | REG3A       | CSNK1A1  | SERPINA3 | 70   | LCN2        | PAFAH1B2 | LINC00657 |
| 21   | GAPDH       | PTEN     | EIF4G2   | 71   | PKM         | RTN4     | DSP       |
| 22   | PPP1CB      | TSPYL1   | RPS4X    | 72   | ATP6V0B     | TMED4    | SPINT2    |
| 23   | ACTB        | C6orf62  | HSPA5    | 73   | PSAP        | CST3     | REG1B     |
| 24   | PRSS1       | RPL3     | ITGB1    | 74   | LRRC75A-AS1 | CD63     | HNRNPC    |
| 25   | RBP4        | DPYSL2   | IAPP     | 75   | S100A11     | TOB1     | RPL15     |
| 26   | GDF15       | UBC      | TPT1     | 76   | MUC13       | HLA-A    | ENO1      |
| 27   | COX8A       | SCG2     | RPL5     | 77   | MAP1B       | CLU      | RPS11     |
| 28   | ALDOA       | ALDH1A1  | SLC7A2   | 78   | CD59        | TTC3     | GANAB     |
| 29   | PDK4        | PFKFB2   | HNRNPA1  | 79   | SLC30A8     | RPS11    | CDH1      |
| 30   | RPL8        | CPE      | ANXA2    | 80   | CPE         | G6PC2    | PEG10     |
| 31   | H3F3B       | C10orf10 | RPL7     | 81   | CLPS        | GRN      | CLDN4     |
| 32   | IGFBP7      | TMBIM6   | RPS18    | 82   | CTSD        | SERPINA1 | GSTP1     |
| 33   | S100A6      | CRYBA2   | PCSK1    | 83   | ATP1B1      | SSR4     | TUBA1A    |
| 34   | EEF2        | FTX      | ATP1A1   | 84   | OLFM4       | RPS6     | RPS27A    |
| 35   | TIMP1       | HSPA8    | IDS      | 85   | TAGLN2      | OAZ1     | PRPF8     |
| 36   | CFL1        | HSP90AA1 | GDF15    | 86   | SCGN        | MARCKS   | HSPB1     |
| 37   | GRN         | H3F3B    | RPS3     | 87   | SERPING1    | RPL15    | RPS8      |
| 38   | SPINT2      | SLC30A8  | RPSA     | 88   | WFS1        | SQSTM1   | RPS12     |
| 39   | SQSTM1      | TLK1     | CSDE1    | 89   | LAPTM4A     | RASD1    | ACLY      |
| 40   | KRT19       | ETNK1    | CLTC     | 90   | TAAR5       | DSP      | MSN       |
| 41   | CD63        | B2M      | RPL10    | 91   | SLC22A17    | COX8A    | HNRNPA2B1 |
| 42   | SLC40A1     | DDX5     | YWHAZ    | 92   | RPL3        | TIMP1    | CTNNB1    |
| 43   | G6PC2       | FOS      | RPL3     | 93   | HERPUD1     | ATP1B1   | MORF4L1   |
| 44   | REG1A       | MAFB     | SLC30A8  | 94   | CD24        | WFS1     | SERINC1   |
| 45   | DDX5        | CD59     | RPL6     | 95   | CALR        | PRDX3    | KRT19     |
| 46   | PCBP1       | TM4SF4   | TMSB10   | 96   | CLDN7       | CHP1     | NCL       |
| 47   | C6orf62     | TMEM33   | CD44     | 97   | LAMP2       | YWHAE    | GPX4      |
| 48   | CRYBA2      | CAPZA1   | NPM1     | 98   | CST3        | FAM46A   | GNB1      |
| 49   | CD74        | CALM2    | B2M      | 99   | TMBIM6      | RUFY3    | RPS7      |
| 50   | HLA-E       | GPX3     | PABPC1   | 100  | CTSB        | C4orf48  | SEP2      |
|      | alpha       | beta     | delta    |      | gamma       | acinar   | ductal    |

**Supplementary Table 6: List of top 100 high weighted genes from the mouse kidney, step 1 of tree-based recursive deconvolution.**

| Rank | Beckerman | Craciun | Arvaniti | Rank | Beckerman     | Craciun       | Arvaniti      |
|------|-----------|---------|----------|------|---------------|---------------|---------------|
| 1    | Kap       | Malat1  | Malat1   | 51   | Cycs          | Dbi           | Rps14         |
| 2    | mt-Atp6   | Kap     | Kap      | 52   | Rplp1         | Rps18         | Cox4i1        |
| 3    | Gpx3      | mt-Atp6 | Gpx3     | 53   | Rpl23         | Rps14         | Rpl26         |
| 4    | mt-Co1    | Gpx3    | S100g    | 54   | Gatm          | Cycs          | Cox5a         |
| 5    | mt-Cytb   | mt-Co1  | Ftl1     | 55   | Rpl32         | Cox4i1        | Rps19         |
| 6    | S100g     | mt-Cytb | Fth1     | 56   | Cyb5a         | Uqcrb         | Rpl10         |
| 7    | mt-Co3    | S100g   | Rps29    | 57   | Acsm2         | Ndr1          | Ttc36         |
| 8    | mt-Co2    | mt-Co3  | Xist     | 58   | Guca2b        | Rpl10         | Rpl35         |
| 9    | mt-Nd4    | mt-Co2  | Rpl37a   | 59   | Uqcrb         | Rpl26         | Gm8730        |
| 10   | mt-Nd1    | mt-Nd4  | Rpl41    | 60   | Rps14         | Rps19         | Dnase1        |
| 11   | Ftl1      | mt-Nd1  | Fxyd2    | 61   | Cox4i1        | Acsm2         | Itm2b         |
| 12   | Fth1      | Ftl1    | Rpl38    | 62   | Rpl26         | Rpl35         | Rpl35a        |
| 13   | Rps29     | Fth1    | Rpl37    | 63   | Cox5a         | Cyb5a         | Rps24         |
| 14   | mt-Nd2    | Rps29   | Miox     | 64   | Rps19         | Miox          | Gm10260       |
| 15   | mt-Nd3    | mt-Nd2  | Eef1a1   | 65   | Ttc36         | Itm2b         | Atp5l         |
| 16   | Rpl37a    | mt-Nd4l | Rpl39    | 66   | Rpl10         | Rpl35a        | Slc34a1       |
| 17   | Rpl41     | mt-Nd3  | Cox6c    | 67   | Dnase1        | Atp5l         | Aldob         |
| 18   | Fxyd2     | Rpl37a  | Rps28    | 68   | Rpl35         | Gm8730        | Cela1         |
| 19   | Rpl38     | Rpl41   | Rps27    | 69   | Rpl35a        | Akr1c21       | Ass1          |
| 20   | Rpl37     | Xist    | Cndp2    | 70   | Atp5l         | Rpl28         | Prdx1         |
| 21   | Miox      | Fxyd2   | Cyp4b1   | 71   | Rps24         | Slc34a1       | Rpl28         |
| 22   | Eef1a1    | Rpl37   | Ndufa4   | 72   | Slc34a1       | Prdx1         | Rpl23a        |
| 23   | Rpl39     | Rpl38   | Akr1c21  | 73   | Gm8730        | Aldob         | Rpl6          |
| 24   | Cox6c     | Eef1a1  | Atp1a1   | 74   | Itm2b         | Rps27a        | Pck1          |
| 25   | Rps28     | Spink1  | Acy3     | 75   | Aldob         | Cox6a1        | Gm10709       |
| 26   | mt-Nd5    | Rpl39   | Atp5k    | 76   | Cela1         | Rps2a         | 2010107E04Rik |
| 27   | Rps27     | Rps28   | Cox7c    | 77   | Ass1          | Rpl23a        | Cox6a1        |
| 28   | Cndp2     | Cox6c   | Klk1     | 78   | Prdx1         | Rps4x         | Slc25a5       |
| 29   | Cyp4b1    | Rps27   | Ubb      | 79   | Rpl28         | Gm10709       | Rps4x         |
| 30   | Ndufa4    | mt-Nd5  | Atp5e    | 80   | Rpl6          | Slc25a5       | Rps27a        |
| 31   | Akr1c21   | mt-Atp8 | Rps2     | 81   | Rpl23a        | Ppia          | Ldhd          |
| 32   | Atp1a1    | Atp1a1  | Ndr1     | 82   | Pck1          | Cox5a         | Cox6b1        |
| 33   | Acy3      | Cox7c   | Rps23    | 83   | 2010107E04Rik | Rpl13         | Rpl18a        |
| 34   | Atp5k     | Ubb     | Gm10076  | 84   | Cox6a1        | Cox6b1        | Calb1         |
| 35   | Cox7c     | Atp5e   | Prdx5    | 85   | Gm10709       | Cox7a2        | Rpl13         |
| 36   | Klk1      | Atp5k   | Rps18    | 86   | Slc25a5       | Gatm          | Atp5b         |
| 37   | Atp5e     | Ndufa4  | Tpt1     | 87   | Rps27a        | Ass1          | Rpl13a        |
| 38   | Ubb       | Rps2    | Chchd10  | 88   | Rps4x         | Ndufa3        | Cox7a2        |
| 39   | Rps2      | Rps23   | Rplp0    | 89   | Ldhd          | Rpl18a        | Ndufa3        |
| 40   | Ndr1      | Gm10076 | Dbi      | 90   | Cox6b1        | Cyp4b1        | Slc27a2       |
| 41   | Rps23     | Klk1    | Rpl29    | 91   | Calb1         | Atp5j         | Actb          |
| 42   | Gm10076   | Rps21   | Rps21    | 92   | Atp5b         | Cox8a         | Ppia          |
| 43   | Prdx5     | Rpl29   | Rplp1    | 93   | Cox7a2        | Acy3          | Rpl36a        |
| 44   | Chchd10   | Prdx5   | Cycs     | 94   | Rpl18a        | Rpl36a        | Atp5j         |
| 45   | Tpt1      | Rplp1   | Rpl23    | 95   | Ndufa3        | Actb          | Chpt1         |
| 46   | Rps18     | Tpt1    | Rpl32    | 96   | Slc27a2       | Ndufa13       | Rps15a        |
| 47   | Dbi       | Rpl23   | Gatm     | 97   | Rpl13         | Rpl13a        | Hrsp12        |
| 48   | Rps21     | Rpl32   | Acsm2    | 98   | Rpl36a        | Ttc36         | Ndufa13       |
| 49   | Rplp0     | Chchd10 | Guca2b   | 99   | Ppia          | 2010107E04Rik | Cox8a         |
| 50   | Rpl29     | Rplp0   | Uqcrb    | 100  | Atp5j         | Gm10260       | Ugt2b38       |
|      | PT        | DCT     | CD-IC    |      | Podo          | T lymph       |               |



**Supplementary Table 7: List of top 100 high weighted genes from the mouse kidney, step 2 of tree-based recursive deconvolution.**

| Immune     |           |          |          |      |           |               |               |
|------------|-----------|----------|----------|------|-----------|---------------|---------------|
| Rank       | Beckerman | Craciun  | Arvaniti | Rank | Beckerman | Craciun       | Arvaniti      |
| 1          | Cd74      | ApoE     | Cd74     | 26   | C1qb      | Npc2          | C1qb          |
| 2          | Lyz2      | S100a6   | Lyz2     | 27   | Nkg7      | Gzma          | Nkg7          |
| 3          | Ccl5      | S100a4   | Ccl5     | 28   | Ccl4      | Capza2        | Vim           |
| 4          | H2-Aa     | Psap     | H2-Aa    | 29   | Vim       | Ly6e          | Ccl4          |
| 5          | H2-Ab1    | Nkg7     | H2-Ab1   | 30   | Ly6c2     | Ly6c2         | Ly6c2         |
| 6          | Tmsb10    | Crip1    | Tmsb10   | 31   | Ms4a4b    | Serinc3       | Ms4a4b        |
| 7          | Gzma      | Cd3g     | Gzma     | 32   | Sat1      | Fos           | Sat1          |
| 8          | H2-Eb1    | Ccl3     | H2-Eb1   | 33   | C1qc      | Pou2f2        | C1qc          |
| 9          | Plac8     | Ccnd2    | Plac8    | 34   | S100a10   | Ctsz          | S100a10       |
| 10         | Cst3      | Slpi     | Cst3     | 35   | H3f3a     | Cd74          | H3f3a         |
| 11         | Ifi2712a  | Gm2a     | Ifi2712a | 36   | Ctss      | Il7r          | Ctss          |
| 12         | Slpi      | Ssr4     | Slpi     | 37   | Gngt2     | H2afy         | Gngt2         |
| 13         | Ifitm3    | Lck      | Ifitm3   | 38   | S100a6    | Ctsb          | S100a6        |
| 14         | ApoE      | Spi1     | ApoE     | 39   | S100a4    | Ifngr1        | S100a4        |
| 15         | Tyrobp    | Fxyd5    | Tyrobp   | 40   | Lst1      | Tgfb1         | Lst1          |
| 16         | Actg1     | Ccl4     | Actg1    | 41   | Klf2      | Sub1          | Klf2          |
| 17         | Crip1     | Gzmb     | Crip1    | 42   | Msrb1     | Socs2         | Msrb1         |
| 18         | Fcer1g    | Cnn2     | Fcer1g   | 43   | H2afz     | Ifitm3        | H2afz         |
| 19         | Cebpb     | Id2      | Cebpb    | 44   | Wfdc17    | Itgb7         | Wfdc17        |
| 20         | C1qa      | Cybb     | C1qa     | 45   | Arpc1b    | Cd79a         | Arpc1b        |
| 21         | AW112010  | Sep1     | AW112010 | 46   | Ifitm2    | Ltb           | Ltb           |
| 22         | Ly6e      | Hsp90b1  | Ly6e     | 47   | Ltb       | Fyb           | Ifitm2        |
| 23         | Id2       | Itgb2    | Id2      | 48   | S100a11   | Tspan32       | S100a11       |
| 24         | Psap      | Ccl6     | Psap     | 49   | Lgals3    | Sat1          | Mzb1          |
| 25         | Lgals1    | Lsp1     | Lgals1   | 50   | Mzb1      | Xbp1          | Lgals3        |
| Epithelial |           |          |          |      |           |               |               |
| Rank       | Beckerman | Craciun  | Arvaniti | Rank | Beckerman | Craciun       | Arvaniti      |
| 1          | Hbb-bs    | Hbb-bs   | Hbb-bs   | 26   | Gm5424    | Slc12a3       | Slc22a28      |
| 2          | Hba-a1    | Hba-a1   | Hba-a1   | 27   | Slc12a3   | Slc22a28      | Slc22a29      |
| 3          | Umod      | Slco1a1  | Slco1a1  | 28   | Nrp1      | Slc22a29      | Emcn          |
| 4          | Slco1a1   | Slc22a6  | Slc22a6  | 29   | Igfbp5    | Ly6c1         | Car12         |
| 5          | Slc22a6   | Pvalb    | Nat8     | 30   | Ehd3      | Car12         | Aspdh         |
| 6          | Pvalb     | Nat8     | Pvalb    | 31   | Slc22a28  | Aspdh         | Akr1c14       |
| 7          | Nat8      | Umod     | Mep1a    | 32   | Slc12a1   | Igfbp5        | Ly6c1         |
| 8          | Mep1a     | Mep1a    | Umod     | 33   | Slc22a29  | Akr1c14       | Hexb          |
| 9          | Egf       | Slco1a6  | Slco1a6  | 34   | Car12     | Atp6v1g3      | BC035947      |
| 10         | Slco1a6   | Ces1f    | Ces1f    | 35   | Aspdh     | Ehd3          | Igfbp5        |
| 11         | Ces1f     | Hbb-bt   | Hbb-bt   | 36   | Akr1c14   | Hexb          | Atp6v1g3      |
| 12         | Hbb-bt    | Egf      | Snhg11   | 37   | Kdr       | Slc12a1       | Nrp1          |
| 13         | Snhg11    | Snhg11   | Tmigd1   | 38   | Atp6v1g3  | BC035947      | Slc13a1       |
| 14         | Tmigd1    | Tmigd1   | Egf      | 39   | Hsd11b2   | Slc13a1       | Slc12a1       |
| 15         | Acsm3     | Acsm3    | Acsm3    | 40   | Hexb      | Col6a6        | Col6a6        |
| 16         | Slc22a30  | Slc22a30 | Slc22a30 | 41   | Eng       | Gm4450        | Gm4450        |
| 17         | Gm11128   | Cyp2a4   | Gm11128  | 42   | BC035947  | Kdr           | Adamts15      |
| 18         | Aqp2      | Hba-a2   | Cyp2a4   | 43   | Pi16      | Adamts15      | Ehd3          |
| 19         | Cyp2a4    | Aqp2     | Hba-a2   | 44   | Slc13a1   | Hsd11b2       | Aspa          |
| 20         | Fxyd4     | Aqp1     | Gm5424   | 45   | Col6a6    | Aspa          | Mogat1        |
| 21         | Emcn      | Gm5424   | Slc17a1  | 46   | Gm4450    | Apela         | D630029K05Rik |
| 22         | Aqp1      | Slc17a1  | Aqp1     | 47   | Egfl7     | Mogat1        | Gm15638       |
| 23         | Hba-a2    | Plpp1    | Aqp2     | 48   | Adamts15  | D630029K05Rik | Hsd11b2       |
| 24         | Ly6c1     | Fxyd4    | Slc12a3  | 49   | Meis2     | Eng           | Akr1c18       |
| 25         | Slc17a1   | Emcn     | Fxyd4    | 50   | Aspa      | Gm15638       | Smlr1         |
|            | PT        | DCT      | CD-IC    | LOH  | CD-PC     | Endo          | Podo          |
|            | Neuro     | T lymph  | Macro    | Fib  | B lymph   | NK            |               |

**Supplementary Table 8: Starting points for convergence analysis**

| Cell type | EQ   | SP1 | SP2 | SP3 | SP4 | SP5 | SP6 | SP7 | SP8 |
|-----------|------|-----|-----|-----|-----|-----|-----|-----|-----|
| alpha     | 0.25 | 0.4 | 0.2 | 0.2 | 0.2 | 0.7 | 0.1 | 0.1 | 0.1 |
| beta      | 0.25 | 0.2 | 0.4 | 0.2 | 0.2 | 0.1 | 0.7 | 0.1 | 0.1 |
| delta     | 0.25 | 0.2 | 0.2 | 0.4 | 0.2 | 0.1 | 0.1 | 0.7 | 0.1 |
| gamma     | 0.25 | 0.2 | 0.2 | 0.2 | 0.4 | 0.1 | 0.1 | 0.1 | 0.7 |

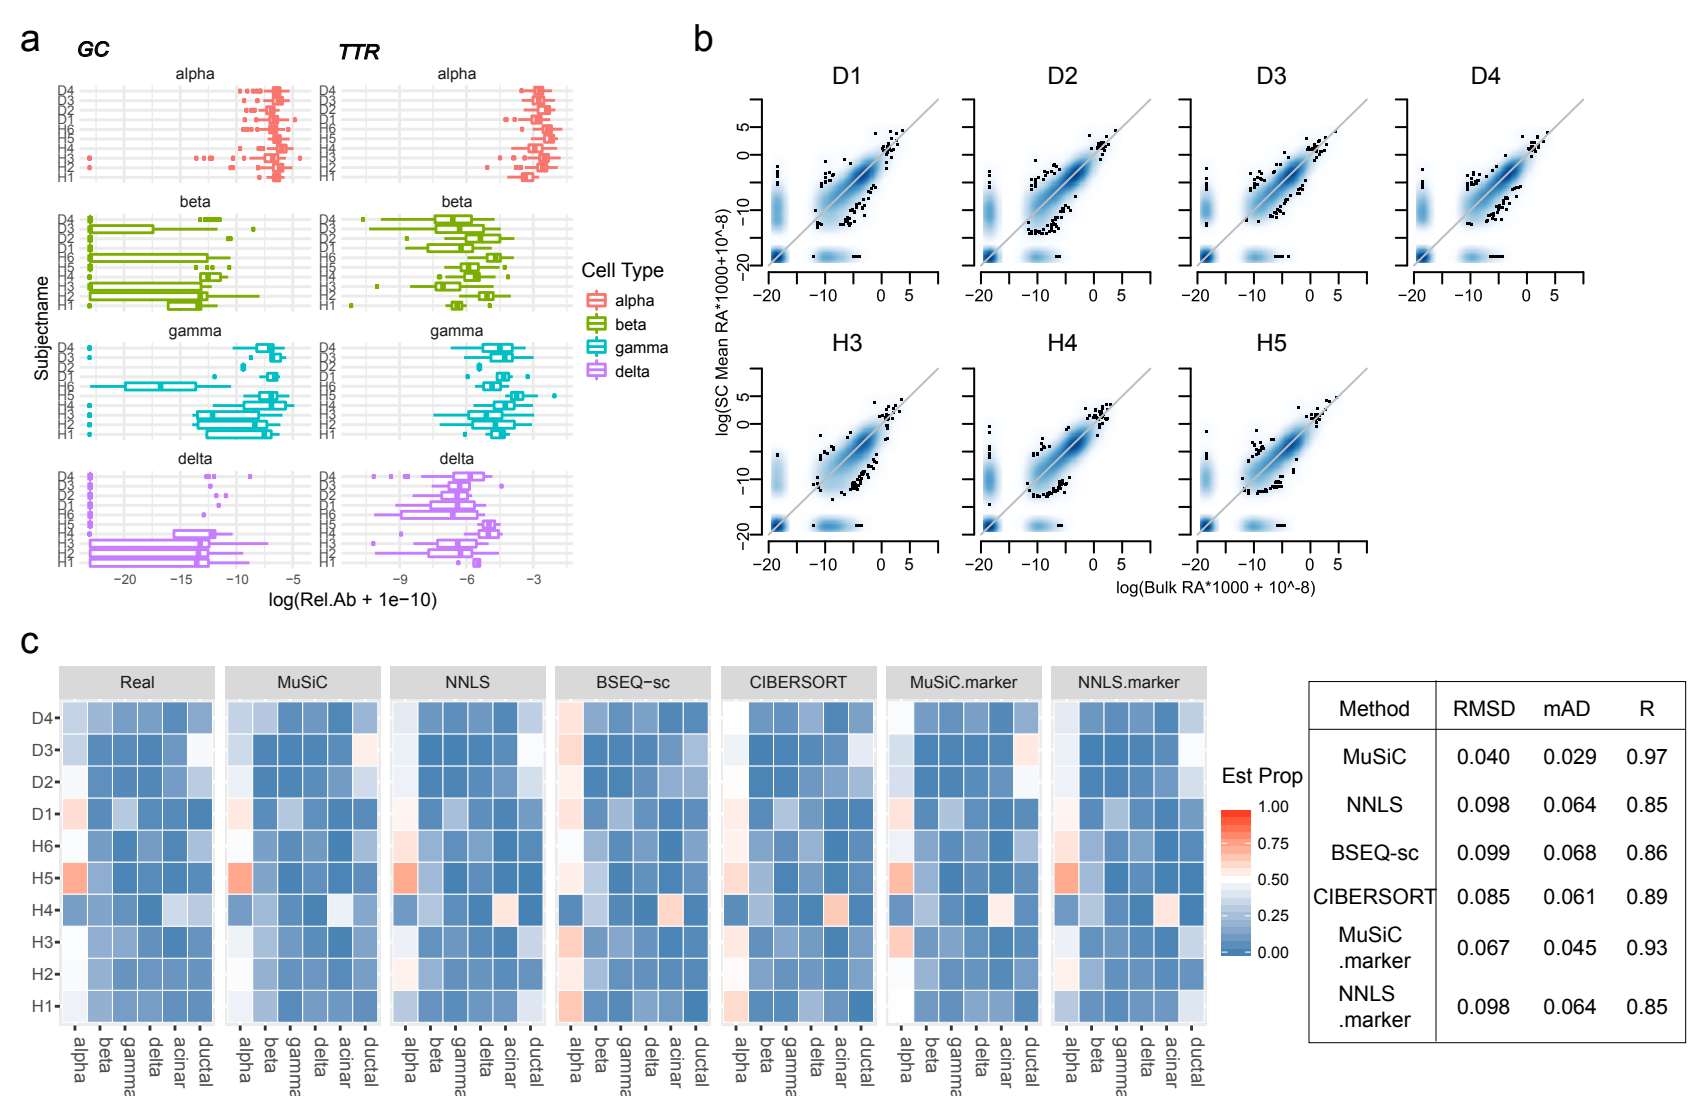

**Supplementary Figure 1: Exploratory analysis of single-cell RNA-seq data from Segerstolpe et al.**

**a.** Example of cross-subject and cross-cell variation in cell type specific gene expression. The boxplot contains 4 cell types: alpha, beta, gamma, and delta cells from Segerstolpe et al. single-cell RNA-seq data. The x-axis is the log transformed average relative abundance across cells from the same cell type, and the y-axis is the subject label. The relative abundance of gene *GC* is widely spread across the x-axis while the relative abundance of gene *TTR* is more concentrated across subjects. We consider gene *GC* as non-informative and *TTR* as informative. **b.** Comparison of log transformed relative abundance levels between real bulk tissue RNA-seq data and artificially constructed bulk RNA-seq data for the same subject. Single-cell and bulk tissue RNA-seq data are both from Segerstolpe et al. Each dot represents a gene and the gray line is  $x=y$ . **c.** Heatmap of true and estimated cell type proportions. In addition to the four methods described in the main text, we also evaluated the estimates given by MuSiC and NNLS when using only the marker genes used in BSEQ-sc. Source data are provided as a Source Data file.

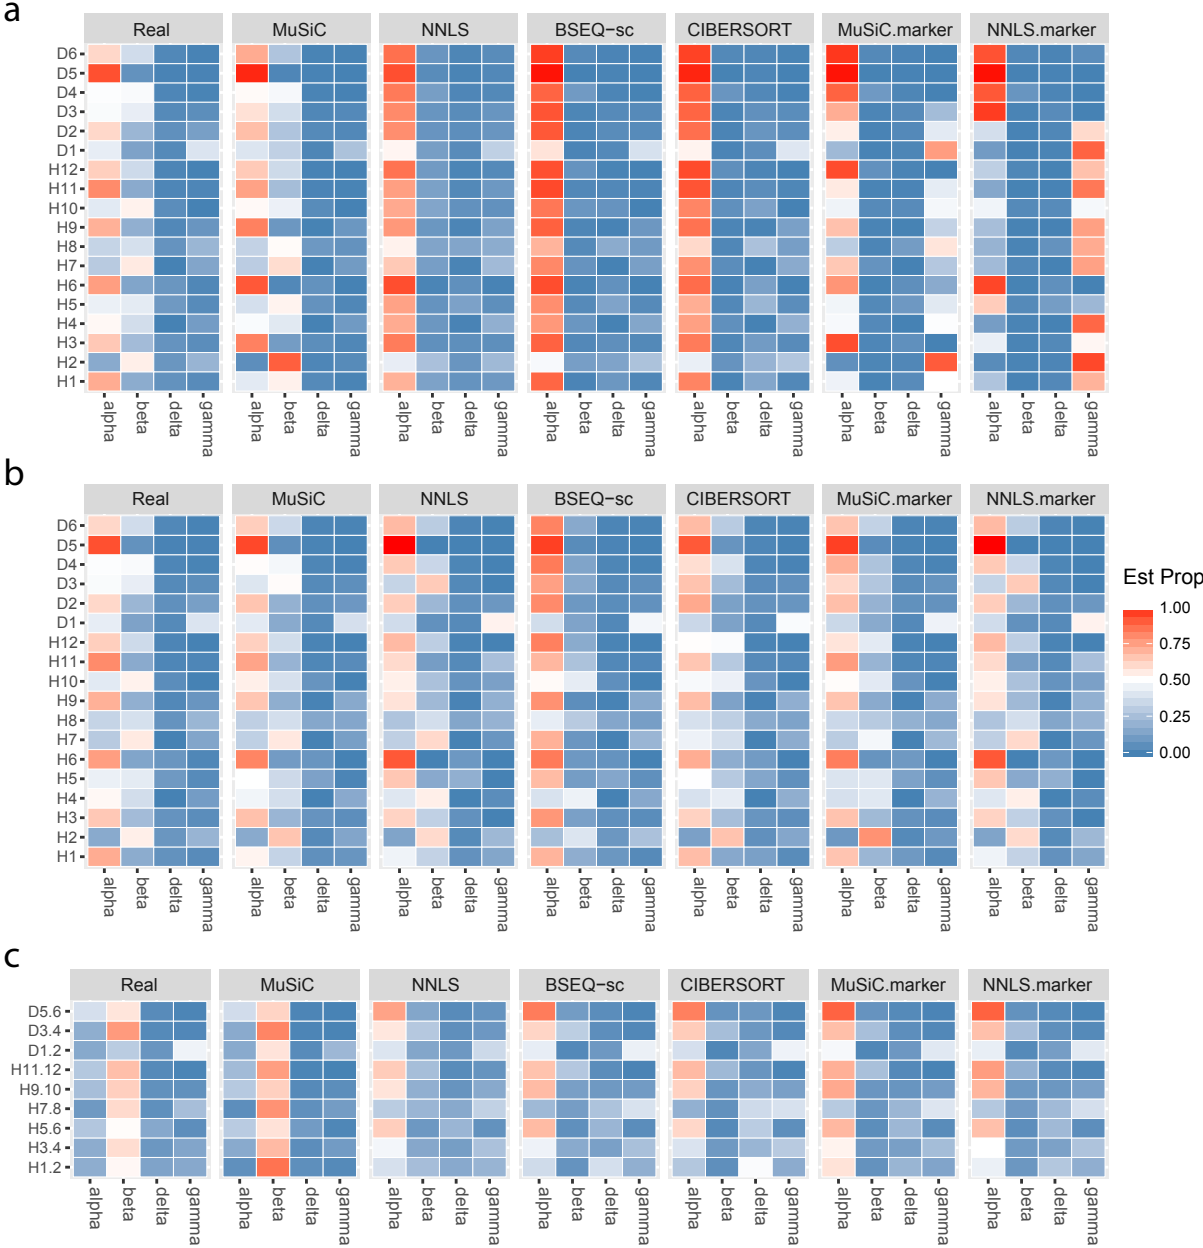

Segerstolpe et al. as reference

| Method        | RMSD | mAD  | R    |
|---------------|------|------|------|
| MuSiC         | 0.10 | 0.06 | 0.94 |
| NNLS          | 0.17 | 0.12 | 0.81 |
| BSEQ-sc       | 0.22 | 0.15 | 0.79 |
| CIBERSORT     | 0.21 | 0.15 | 0.76 |
| MuSiC .marker | 0.25 | 0.18 | 0.60 |
| NNLS .marker  | 0.34 | 0.26 | 0.30 |

Xin et al. as reference

| Method        | RMSD | mAD   | R    |
|---------------|------|-------|------|
| MuSiC         | 0.05 | 0.033 | 0.98 |
| NNLS          | 0.10 | 0.072 | 0.92 |
| BSEQ-sc       | 0.13 | 0.088 | 0.87 |
| CIBERSORT     | 0.07 | 0.053 | 0.95 |
| MuSiC .marker | 0.07 | 0.048 | 0.96 |
| NNLS .marker  | 0.10 | 0.072 | 0.92 |

| Method        | RMSD | mAD  | R    |
|---------------|------|------|------|
| MuSiC         | 0.10 | 0.07 | 0.94 |
| NNLS          | 0.25 | 0.19 | 0.23 |
| BSEQ-sc       | 0.28 | 0.21 | 0.16 |
| CIBERSORT     | 0.30 | 0.24 | 0.03 |
| MuSiC .marker | 0.31 | 0.23 | 0.10 |
| NNLS .marker  | 0.31 | 0.23 | 0.08 |

**Supplementary Figure 2:** Heatmaps of true and estimated cell type proportions of artificial bulk data constructed using single-cell RNA-seq data from Xin et al.

**a.** Deconvolution results when the single-cell reference is from the 6 healthy subjects of Segerstolpe et al. with leave-one-out, i.e., for each subject under deconvolution, only single-cell data from the remaining 5 subjects were used as single-cell reference.

**b.** Deconvolution results when the single-cell reference is from the 12 healthy subjects of Xin et al. with leave-one-out, i.e., for each subject under deconvolution, only single-cell data from the remaining 11 subjects were used as single-cell reference.

**c.** The cell type proportions for the artificial bulk data are manually adjusted so that beta cells are the dominant cell type, as expected in real bulk tissue. Alpha cells dominate in the scRNA-seq data due to dissociation and capture bias. Thus, this analysis mirrors the real data analysis scenario where cell type proportions differ substantially between scRNA-seq reference and bulk tissue. In more detail, we combined cells from two subjects as one artificial bulk tissue RNA-seq dataset, for example, H1.2 combined cells from subject H1 and H2. Then we dropped 75% of the alpha cells at random. The single-cell reference is from the 6 healthy subjects of Segerstolpe et al. Here, all methods that rely on pre-selected marker genes from CIBERSORT are heavily biased by the cell type proportions in the single cell reference, and miss the true cell type proportions in the bulk tissue data. In comparison, MuSiC is able to adjust to the difference between scRNA-seq reference and bulk data. Source data are provided as a Source Data file.

# Estimated Proportion with missing cell type

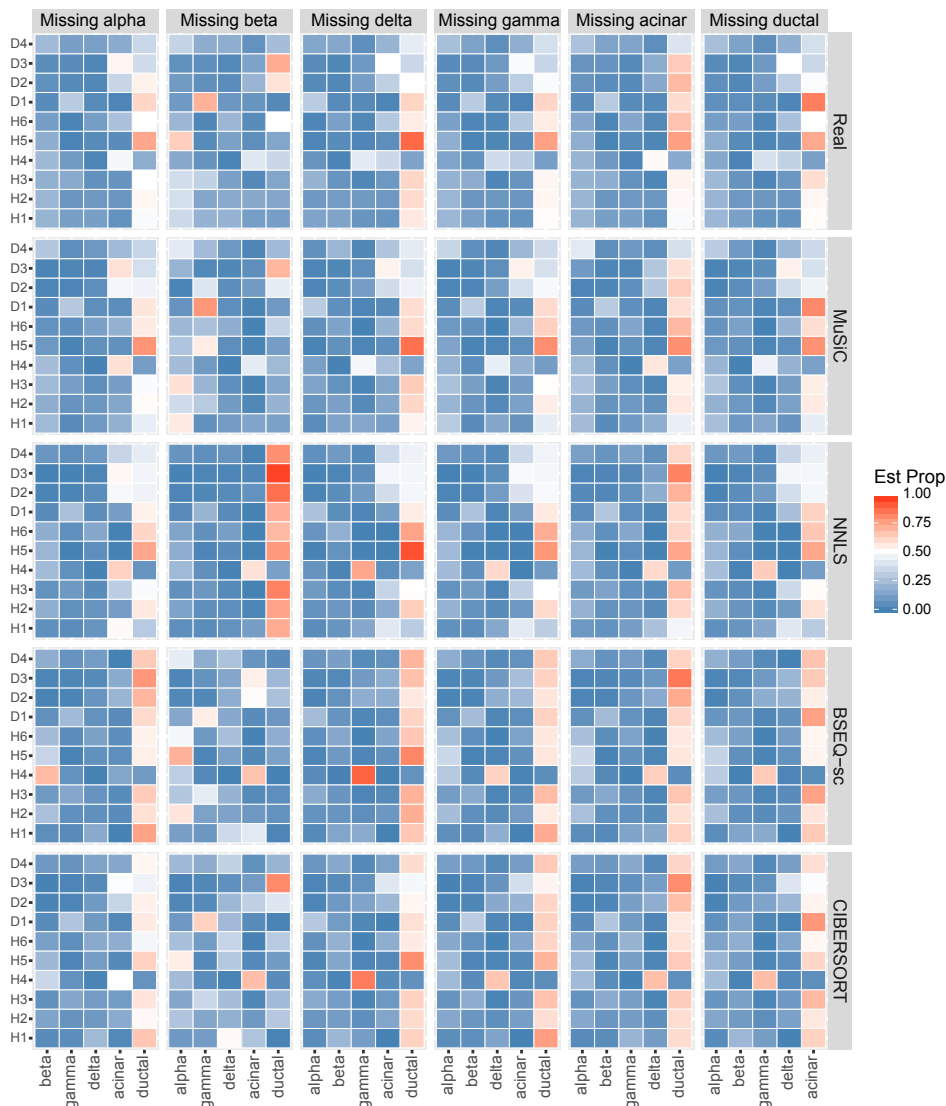

**Supplementary Figure 3:** Heatmaps of true and estimated cell type proportions with missing cell types in single-cell reference.

The artificial bulk data and the single-cell reference are both from Segerstolpe et al. We constrained our analysis to the 6 major cell types: alpha, beta, delta, gamma, acinar and ductal cells. The artificial bulk data is constructed by summing read counts from the 6 major cell types while the single-cell reference contains only 5 cell types (the column header shows the cell type that is missing in the single-cell reference). The x-axis labels cell types used in the single-cell reference and the y-axis shows the subject label. The top panel shows the true composition, while panels below it show the results from each method. See **Supplementary Table 3** for detailed evaluation results. Source data are provided as a Source Data file.

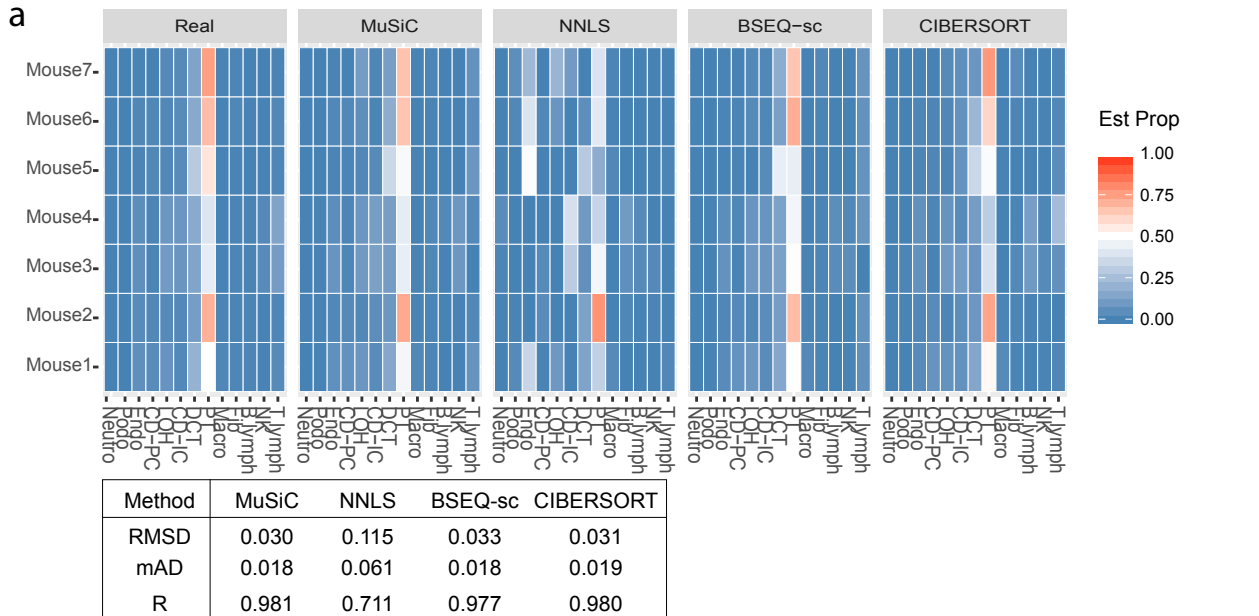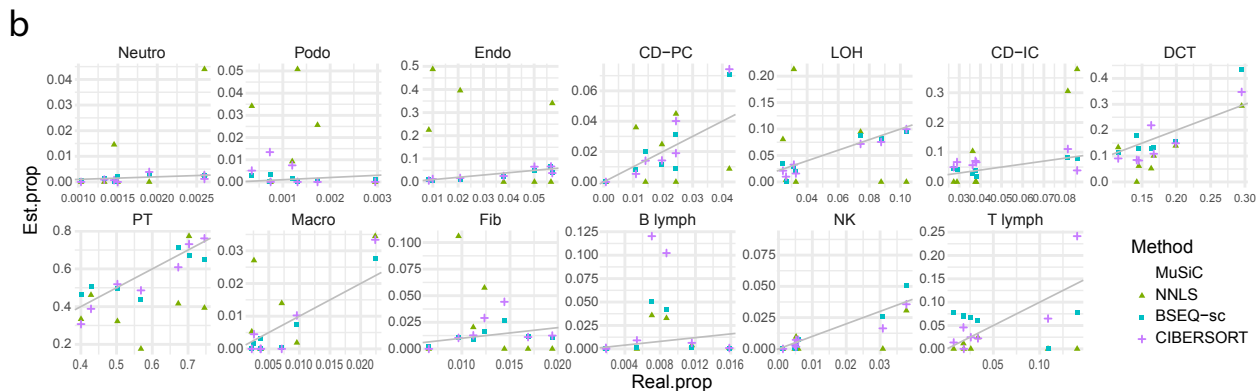

**Supplementary Figure 4:** Benchmark evaluation using mouse kidney single-cell RNA-seq data from Park et al.

The artificial bulk RNA-seq data is constructed by summing read counts across cells in all 16 cell types while the single-cell reference only consists of 13 cell types. The other 3 cell types were discarded in the single-cell reference because they are too rare.

**a.** Heatmap of estimated cell type proportions and evaluation results. **b.** Scatter plot of real cell type proportions versus estimated cell type proportions. Source data are provided as a Source Data file.

**a**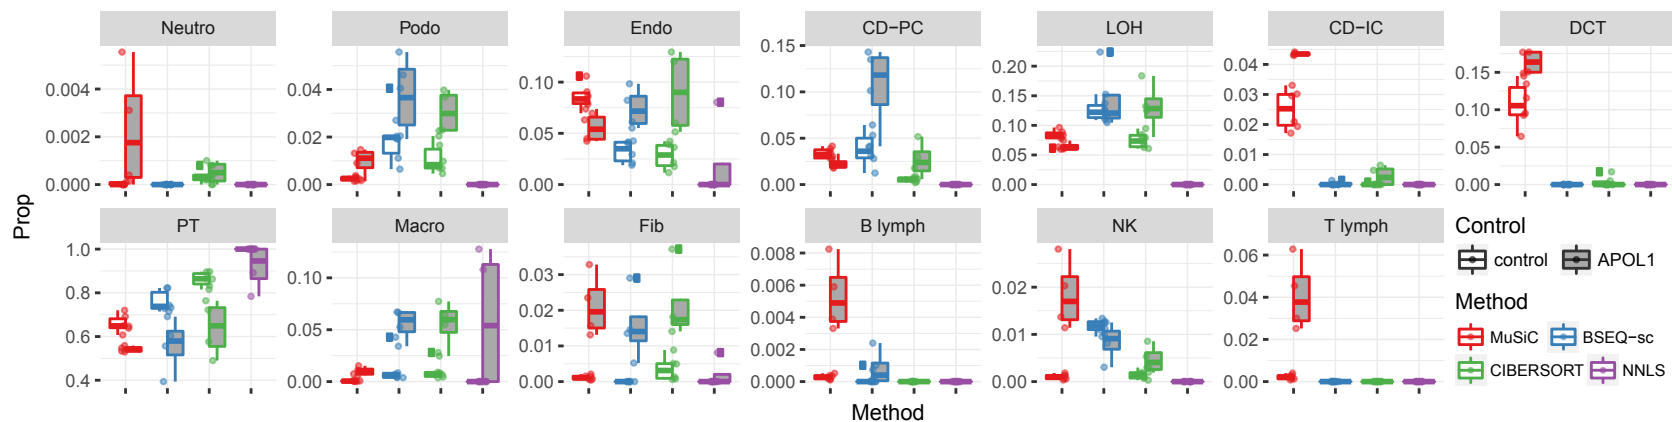**b**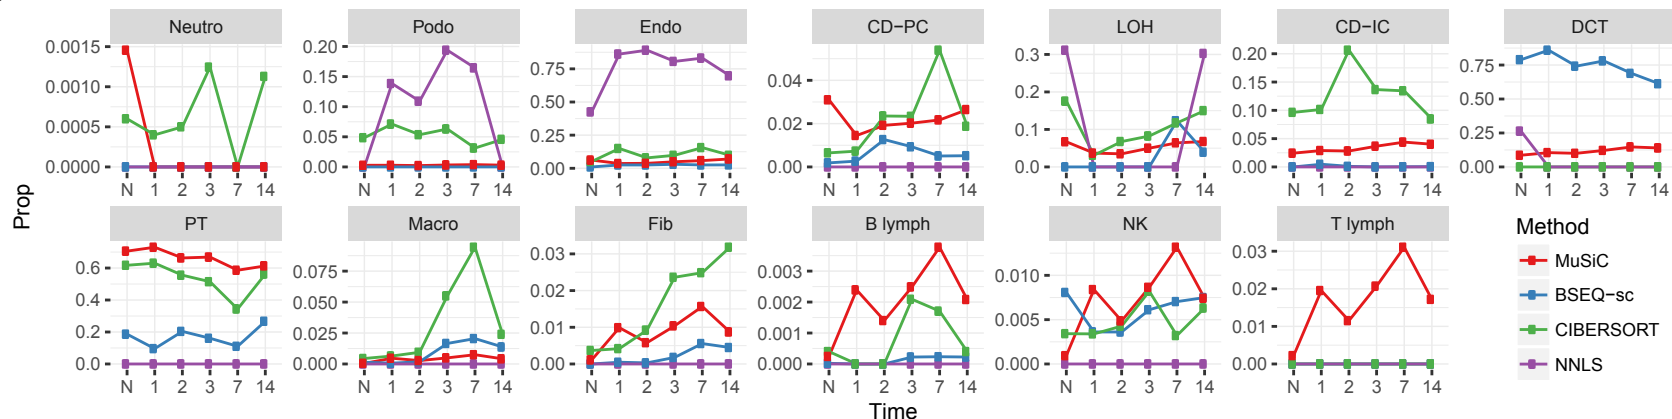**c**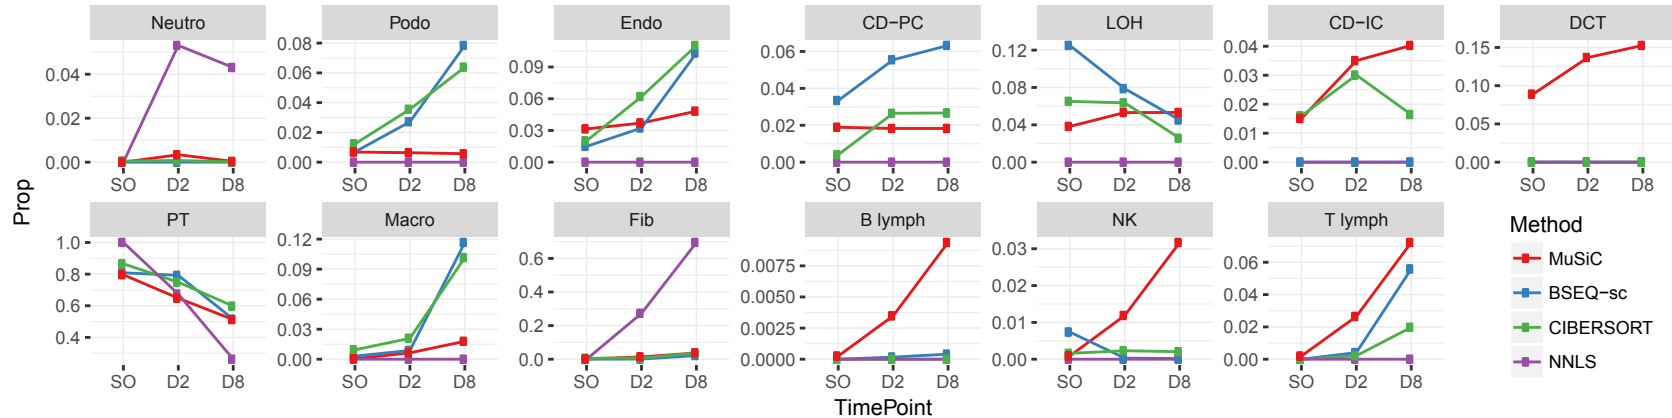

**Supplementary Figure 5:** Estimated cell type proportions of the 13 cell types in three real mouse bulk RNA-seq datasets.

**a.** Boxplot of estimated cell type proportions of 10 mice (4 APOL1 disease mice and 6 control mice) from Beckerman et al. **b.** Line plot of cell type proportion changes after FA induction (Craciun et al.) at 6 time points. There are 3 replicates at each time point and the average proportions are plotted. N: normal. **c.** Line plot of cell type proportions of control (Sham operated mice), 2 days and 8 days after UUO (Arvaniti et al.). Source data are provided as a Source Data file.

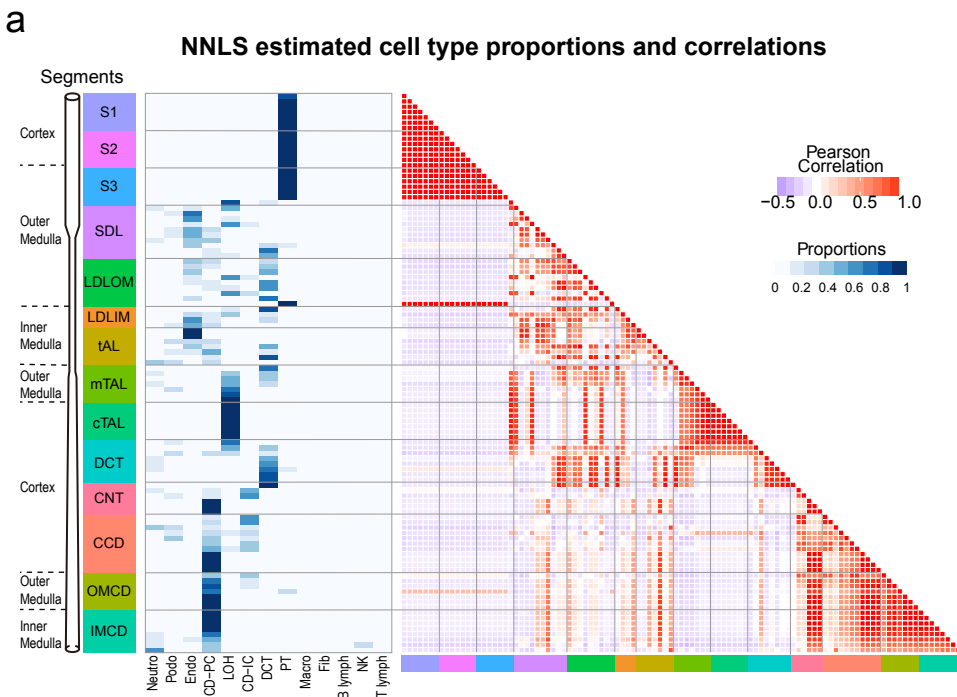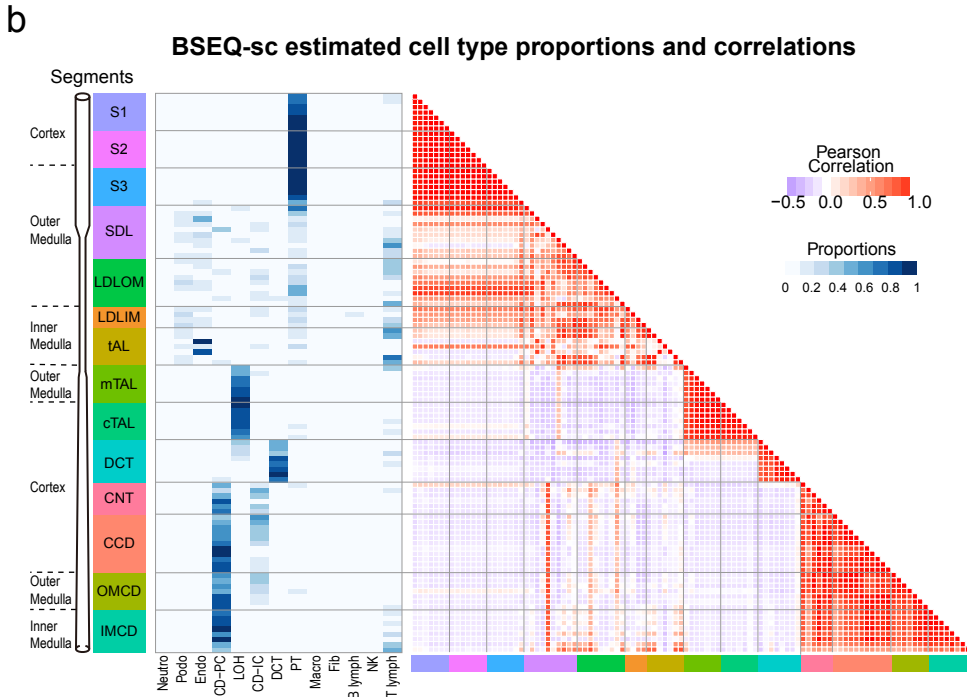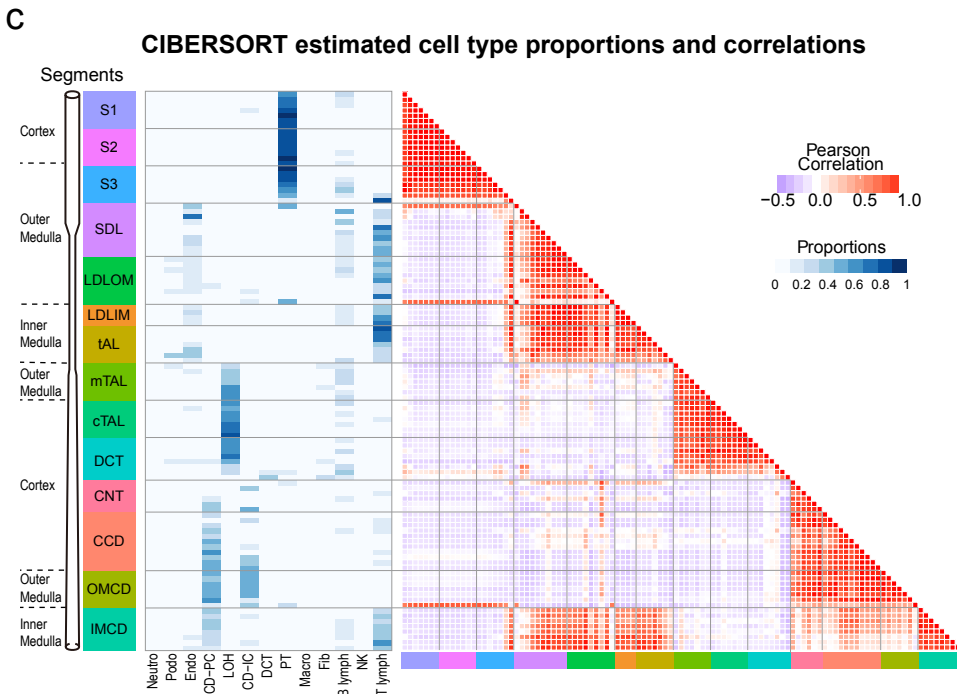

**Supplementary Figure 6:** Estimated cell type proportions and correlation of the estimated cell type proportions across samples for bulk RNA-seq data of rat renal tubule segments (Lee et al.). Park et al. mouse single-cell RNA-seq data are used as reference. **a.** NNLS. **b.** BSEQ-sc. **c.** CIBERSORT. Source data are provided as a Source Data file.



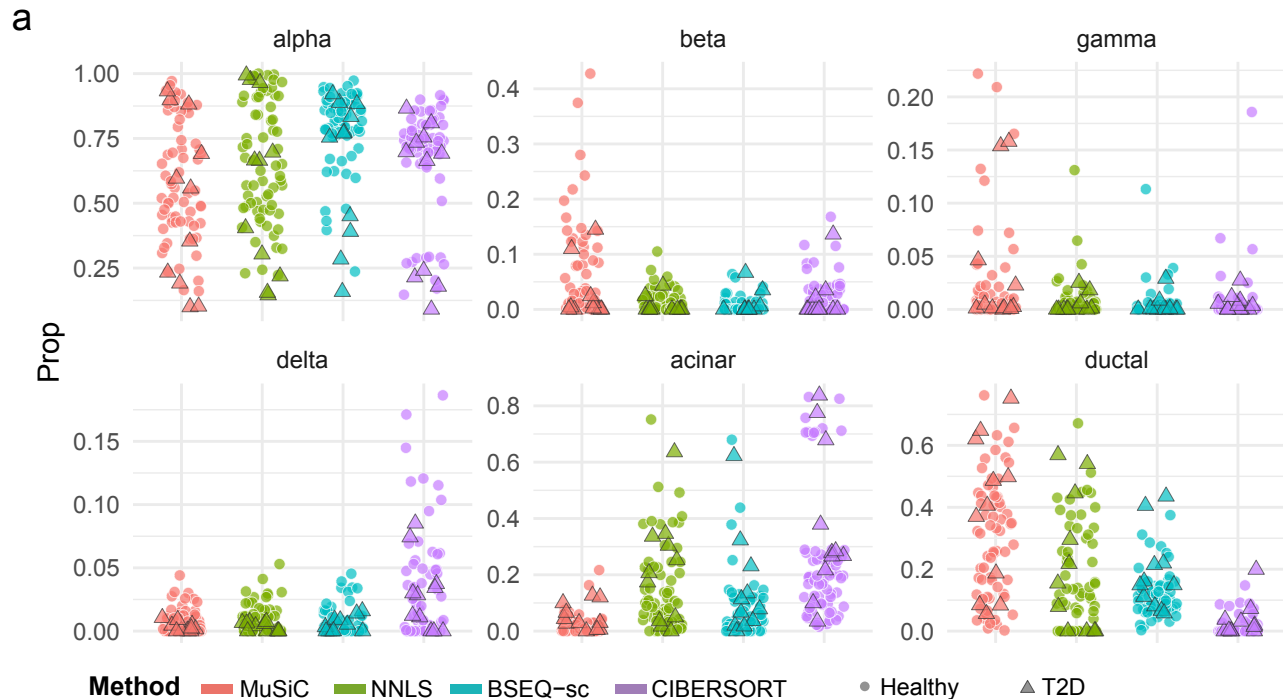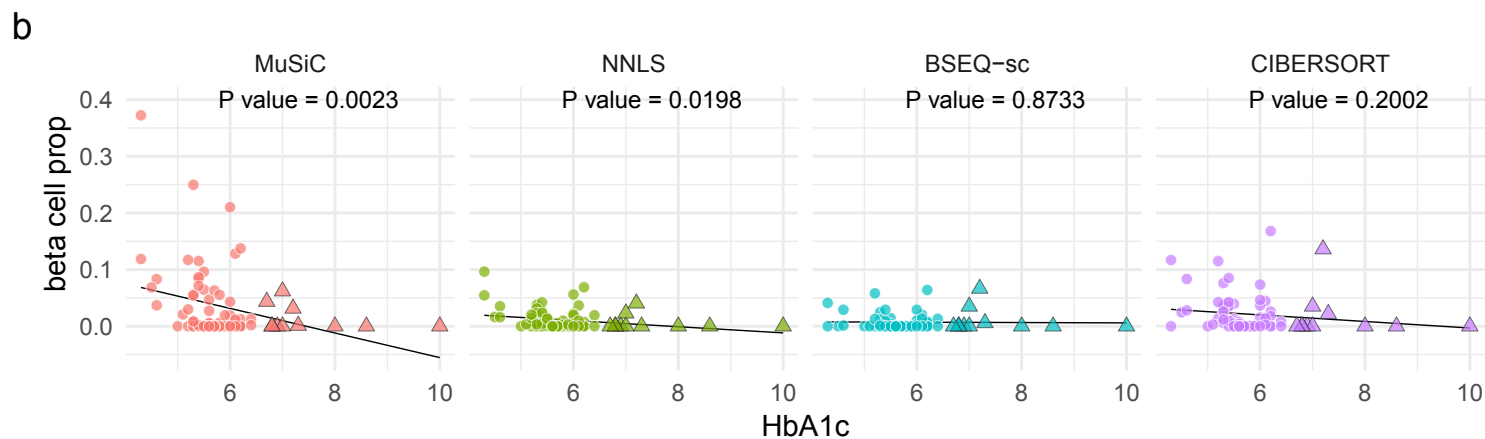

**Supplementary Figure 7:** Estimated cell type proportions of the pancreatic islet bulk RNA-seq data in Fadista et al. with single cell reference from Baron et al.

The analysis is similar to **Figure 2c-d** in the main text except that the single-cell reference are based on the three healthy subjects from Baron et al. and the MuSiC estimation was adjusted for protocol bias as described in the **Methods** section. **a.** Jitter plot of the estimated cell type proportions for Fadista et al. subjects, color-coded by deconvolution methods. 77 out of the 89 subjects from Fadista et al. that have recoded HbA1c levels are plotted. T2D subjects are denoted as triangles. **b.** HbA1c levels vs beta cell type proportions estimated by each of the four methods. The reported p-values are from single variable regression  $\beta$  cell proportions  $\sim$  HbA1c. Multivariable regression results adjusting for age, BMI and gender are reported in **Supplementary Table 2**. Source data are provided as a Source Data file.

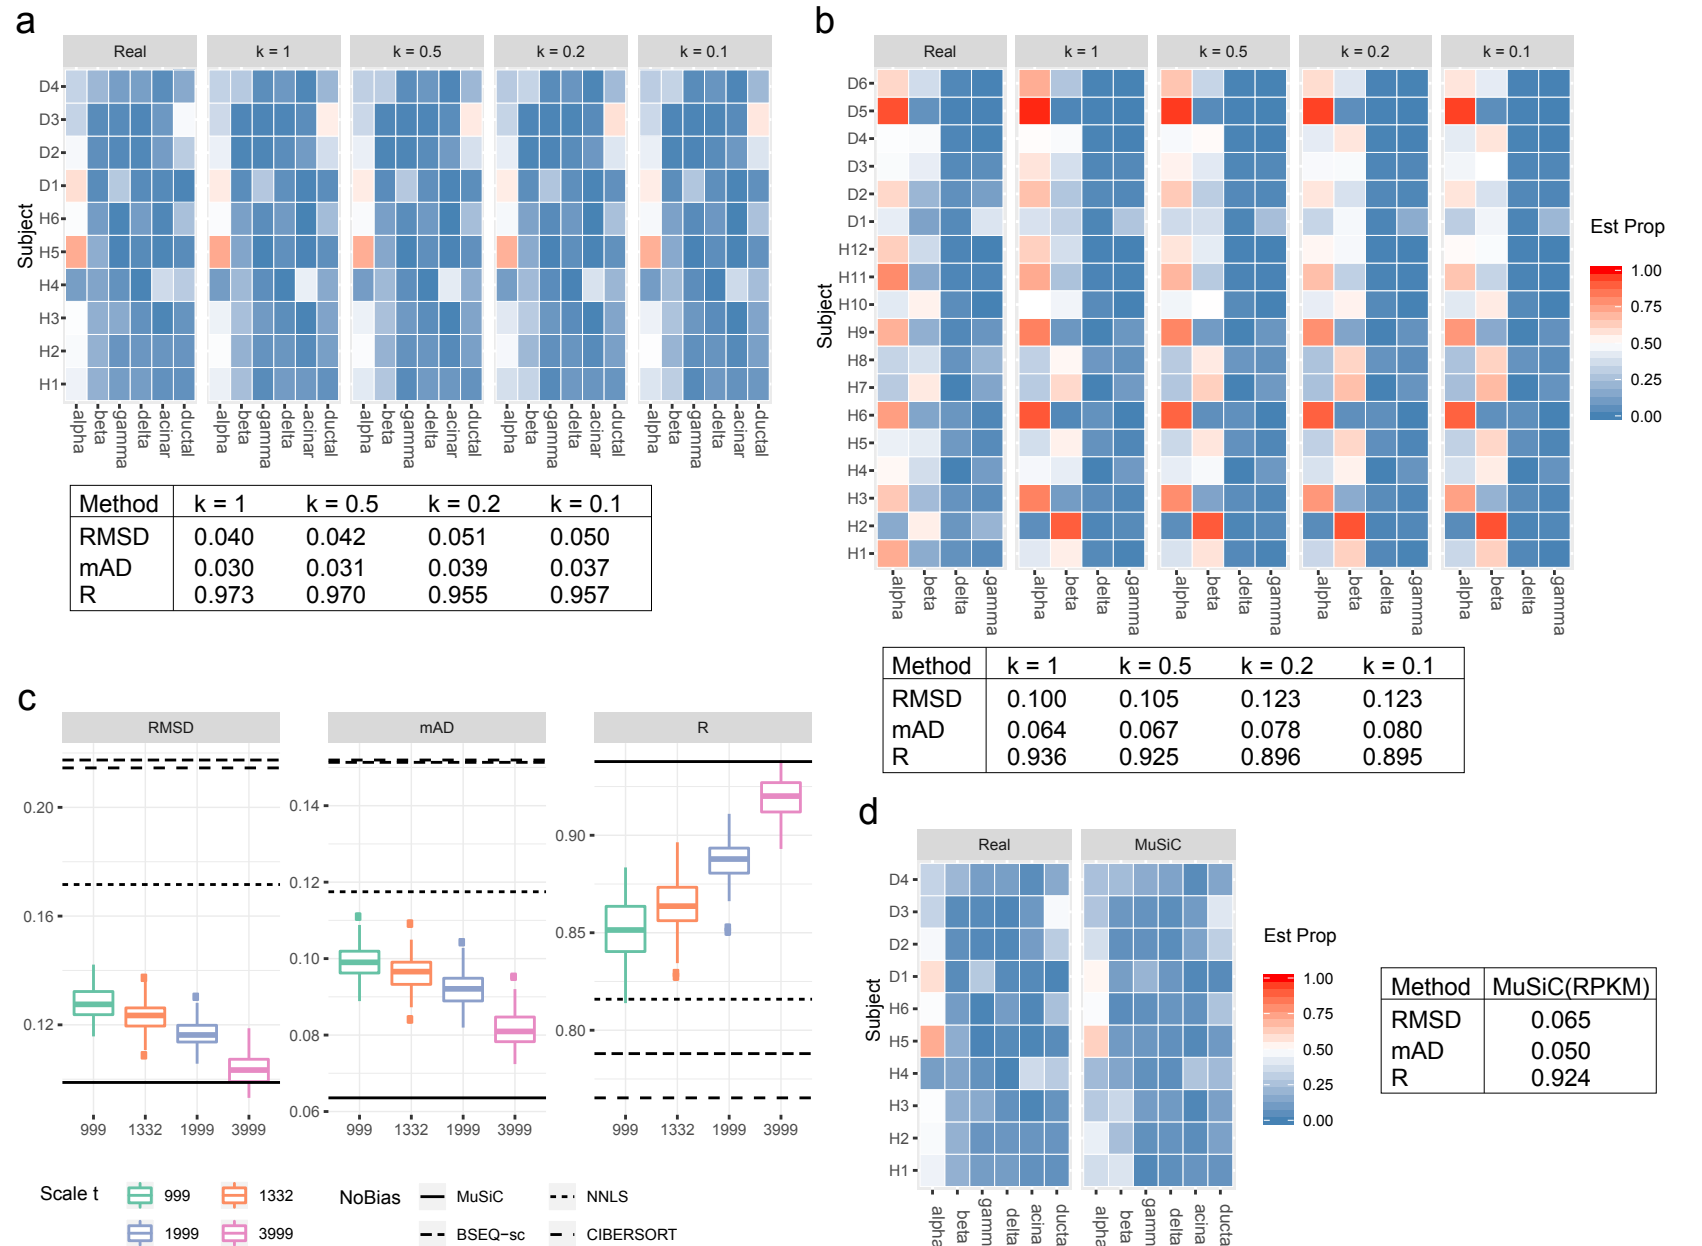

**Supplementary Figure 8: Benchmark evaluation of robustness of MuSiC.**

**a.** and **b.** evaluate the impact of different dropout rate in scRNA-seq (**Supplementary Note 5**). **a.** and **b.** show heatmaps of MuSiC estimated cell type proportions. The single-cell reference is based on six healthy subjects from Segerstolpe et al. with different dropout rates. The artificial bulk data of **a.** is constructed by Segerstolpe et al. while **b.** is constructed by Xin et al. **c.** Evaluation of the impact of biased relative abundance 84 in the single-cell reference (**Supplementary Note 4**). Boxplot shows three evaluation metrics from 100 simulations of MuSiC estimated cell type proportions with biased relative abundance, color-coded by scale parameter of Dirichlet distribution. The horizontal lines show the evaluation metrics of four methods without bias in the single-cell reference. **d.** Heatmap of MuSiC estimated cell type proportions with RPKM as the input. The artificial bulk data and single-cell reference are both from Segerstolpe et al. The estimation follows leave-out-one rule. We utilized the average library size ratio of the six healthy subjects from Segerstolpe et al. as the ratio of cell size. Source data are provided as a Source Data file.

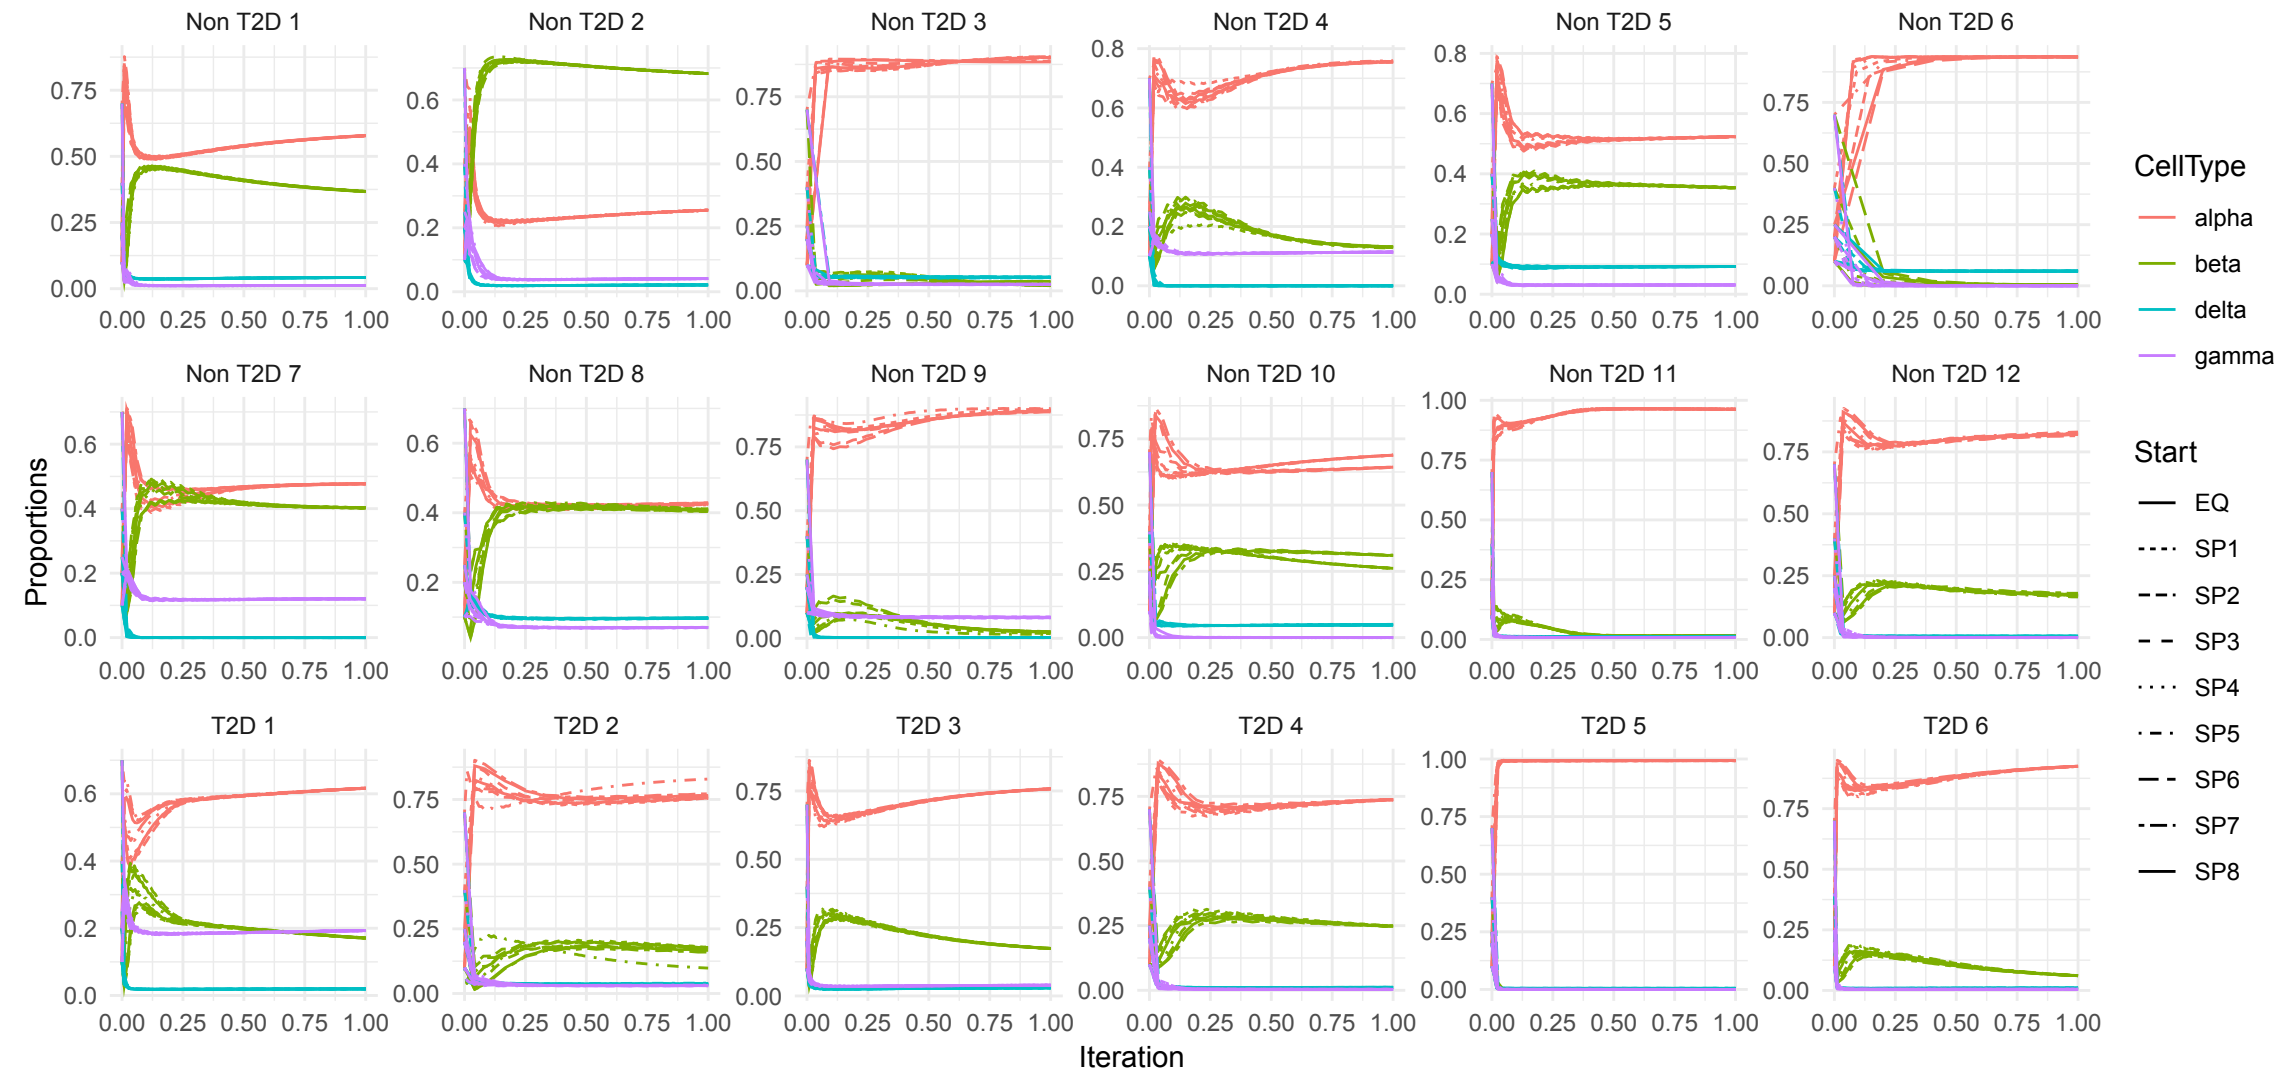

**Supplementary Figure 9:** Convergence of MuSiC with different starting points.

The evaluation is performed on artificial bulk data, constructed by single-cell data from Xin et al. while the single-cell reference is from Segerstolpe et al. We evaluate the convergence of MuSiC with nine different starting points of four cell types in **Supplementary Table 8**. The iteration numbers are normalized between 0 and 1 for comparison. We plotted the normalized iteration against estimated proportions for each subjects in Xin et al. colored by cell types. From different starting points, estimated cell types converged to the same proportions.

## Reference

1. Xin, Y. *et al.* RNA sequencing of single human islet cells reveals type 2 diabetes genes. *Cell metabolism* **24**, 608-615 (2016).
2. Fadista, J. *et al.* Global genomic and transcriptomic analysis of human pancreatic islets reveals novel genes influencing glucose metabolism. *Proceedings of the National Academy of Sciences* **111**, 13924-13929 (2014).
3. Segerstolpe, Å. *et al.* Single-cell transcriptome profiling of human pancreatic islets in health and type 2 diabetes. *Cell metabolism* **24**, 593-607 (2016).
4. Jia, C. *et al.* Accounting for technical noise in differential expression analysis of single-cell RNA sequencing data. *Nucleic acids research* **45**, 10978-10988 (2017).
5. Baron, M. *et al.* A Single-Cell Transcriptomic Map of the Human and Mouse Pancreas Reveals Inter- and Intra-cell Population Structure. *Cell Syst* **3**, 346-360 e4 (2016).
6. Park, J. *et al.* Single-cell transcriptomics of the mouse kidney reveals potential cellular targets of kidney disease. *Science*, eaar2131 (2018).
