# Supplementary material for: Bulk tissue cell type deconvolution with multi-subject single-cell expression reference
Source: PubMed Central journal article supplement (PMC6342984; doi:10.1038/s41467-018-08023-x), 2019-01-22
Supplement: 41467_2018_8023_MOESM3_ESM.pdf [file 41467_2018_8023_MOESM3_ESM.pdf]

## Reporting Summary

Nature Research wishes to improve the reproducibility of the work that we publish. This form provides structure for consistency and transparency in reporting. For further information on Nature Research policies, see [Authors & Referees](#) and the [Editorial Policy Checklist](#).

### Statistical parameters

When statistical analyses are reported, confirm that the following items are present in the relevant location (e.g. figure legend, table legend, main text, or Methods section).

n/a Confirmed

- The exact sample size ( $n$ ) for each experimental group/condition, given as a discrete number and unit of measurement
- An indication of whether measurements were taken from distinct samples or whether the same sample was measured repeatedly
- The statistical test(s) used AND whether they are one- or two-sided  
*Only common tests should be described solely by name; describe more complex techniques in the Methods section.*
- A description of all covariates tested
- A description of any assumptions or corrections, such as tests of normality and adjustment for multiple comparisons
- A full description of the statistics including central tendency (e.g. means) or other basic estimates (e.g. regression coefficient) AND variation (e.g. standard deviation) or associated estimates of uncertainty (e.g. confidence intervals)
- For null hypothesis testing, the test statistic (e.g.  $F$ ,  $t$ ,  $r$ ) with confidence intervals, effect sizes, degrees of freedom and  $P$  value noted  
*Give  $P$  values as exact values whenever suitable.*
- For Bayesian analysis, information on the choice of priors and Markov chain Monte Carlo settings
- For hierarchical and complex designs, identification of the appropriate level for tests and full reporting of outcomes
- Estimates of effect sizes (e.g. Cohen's  $d$ , Pearson's  $r$ ), indicating how they were calculated
- Clearly defined error bars  
*State explicitly what error bars represent (e.g. SD, SE, CI)*

*Our web collection on [statistics for biologists](#) may be useful.*

### Software and code

Policy information about [availability of computer code](#)

Data collection

No software is used in data collecting.

Data analysis

CIBERSORT[<https://cibersort.stanford.edu/>]: an analytical tool to provide an estimation of the abundances of member cell types in a mixed cell population, using gene expression data;  
 BSEQ-sc[<https://github.com/shenorrLab/bseqsc>]: Bioinformatics analysis pipeline that leverages single-cell sequencing data to estimate cell type proportion.  
 MuSiC[<https://github.com/xuranw/MuSiC>]: deconvolution method that utilizes cross-subject scRNA-seq to estimate cell type proportions in bulk RNA-seq data.

For manuscripts utilizing custom algorithms or software that are central to the research but not yet described in published literature, software must be made available to editors/reviewers upon request. We strongly encourage code deposition in a community repository (e.g. GitHub). See the Nature Research [guidelines for submitting code & software](#) for further information.

## Data

Policy information about [availability of data](#)

All manuscripts must include a [data availability statement](#). This statement should provide the following information, where applicable:

- Accession codes, unique identifiers, or web links for publicly available datasets
- A list of figures that have associated raw data
- A description of any restrictions on data availability

This study was a re-analysis of existing data, which is openly available at locations cited in the Reference section. The detailed data informations are

1. E-MTAB-5061[<https://www.ebi.ac.uk/arrayexpress/experiments/E-MTAB-5061/>]
2. E-MTAB-5060[<https://www.ebi.ac.uk/arrayexpress/experiments/E-MTAB-5060/>]
3. GSE81608[<https://www.ncbi.nlm.nih.gov/geo/query/acc.cgi?acc=GSE81608>]
4. GSE81433[<https://www.ncbi.nlm.nih.gov/geo/query/acc.cgi?acc=GSE81433>]
5. GSE50244[<https://www.ncbi.nlm.nih.gov/geo/query/acc.cgi?acc=GSE50244>]
6. GSE107585[<https://www.ncbi.nlm.nih.gov/geo/query/acc.cgi?acc=GSE107585>]
7. GSE81492[<https://www.ncbi.nlm.nih.gov/geo/query/acc.cgi?acc=GSE81492>]
8. GSE56743[<https://www.ncbi.nlm.nih.gov/geo/query/acc.cgi?acc=GSE56743>]
9. GSE65267[<https://www.ncbi.nlm.nih.gov/geo/query/acc.cgi?acc=GSE65267>]
10. GSE79443[<https://www.ncbi.nlm.nih.gov/geo/query/acc.cgi?acc=GSE79443>]

The source data underlying Figures 2a-d, 3b-e and Supplementary Figure 1c, Supplementary Figures 2-8 are provided as a Source Data file. All relevant data is available upon request.

## Field-specific reporting

Please select the best fit for your research. If you are not sure, read the appropriate sections before making your selection.

- Life sciences       Behavioural & social sciences       Ecological, evolutionary & environmental sciences

For a reference copy of the document with all sections, see [nature.com/authors/policies/ReportingSummary-flat.pdf](https://www.nature.com/authors/policies/ReportingSummary-flat.pdf)

## Life sciences study design

All studies must disclose on these points even when the disclosure is negative.

|                 |                                 |
|-----------------|---------------------------------|
| Sample size     | <input type="text" value="NA"/> |
| Data exclusions | <input type="text" value="NA"/> |
| Replication     | <input type="text" value="NA"/> |
| Randomization   | <input type="text" value="NA"/> |
| Blinding        | <input type="text" value="NA"/> |

## Reporting for specific materials, systems and methods

### Materials & experimental systems

- |                                     |                                                      |
|-------------------------------------|------------------------------------------------------|
| n/a                                 | Involvement in the study                             |
| <input checked="" type="checkbox"/> | <input type="checkbox"/> Unique biological materials |
| <input checked="" type="checkbox"/> | <input type="checkbox"/> Antibodies                  |
| <input checked="" type="checkbox"/> | <input type="checkbox"/> Eukaryotic cell lines       |
| <input checked="" type="checkbox"/> | <input type="checkbox"/> Palaeontology               |
| <input checked="" type="checkbox"/> | <input type="checkbox"/> Animals and other organisms |
| <input checked="" type="checkbox"/> | <input type="checkbox"/> Human research participants |

### Methods

- |                                     |                                                 |
|-------------------------------------|-------------------------------------------------|
| n/a                                 | Involvement in the study                        |
| <input checked="" type="checkbox"/> | <input type="checkbox"/> ChIP-seq               |
| <input checked="" type="checkbox"/> | <input type="checkbox"/> Flow cytometry         |
| <input checked="" type="checkbox"/> | <input type="checkbox"/> MRI-based neuroimaging |
